1 **Transition from a meiotic to a somatic-like DNA damage response during the**  
2 **pachytene stage in mouse meiosis**

3

4 **Andrea Enguita-Marruedo<sup>§</sup>, Marta Martín-Ruiz, Eva García, Ana Gil-Fernández, M. Teresa Parra,**  
5 **Alberto Viera, Julio S. Rufas and Jesus Page**

6

7 Departamento de Biología, Facultad de Ciencias, Universidad Autónoma de Madrid, Madrid, Spain

8 <sup>§</sup>Current address: Department of Developmental Biology, Erasmus Medical Center, Rotterdam, The  
9 Netherlands

10 Correspondence to:

11 Jesus Page

12 e-mail: [jesus.page@uam.es](mailto:jesus.page@uam.es)

13

14 Running title: Differential patterns of DNA repair in meiosis

15 Key Words: Meiosis, Homologous recombination, Non-homologous end joining, DMC1, RAD51, 53BP1,  
16  $\gamma$ H2AX, XRCC4.

17

## 18 **Abstract**

19 Homologous recombination (HR) is the principal mechanism of DNA repair acting during meiosis and is  
20 fundamental for the segregation of chromosomes and the increase of genetic diversity. Nevertheless, non-  
21 homologous end joining (NHEJ) mechanisms also act during meiosis, mainly in response to exogenously-  
22 induced DNA damage in late stages of first meiotic prophase. In order to better understand the  
23 relationship between these two repair pathways, we studied the response to DNA damage during male  
24 mouse meiosis after gamma radiation. We clearly discerned two types of responses immediately after  
25 treatment. From leptotene to early pachytene, exogenous damage triggered the massive presence of  
26  $\gamma$ H2AX throughout the nucleus, which was associated with DNA repair mediated by HR components (DMC1  
27 and RAD51). This early pathway finished with the sequential removal of DMC1 and RAD51 and was no  
28 longer inducible at mid pachytene. However, from mid pachytene to diplotene,  $\gamma$ H2AX appeared as large  
29 discrete foci. This late repair pattern was mediated first by NHEJ, involving Ku70/80 and XRCC4, which  
30 were constitutively present, and 53BP1, which appeared at sites of damage soon after irradiation.  
31 Nevertheless, 24 hours after irradiation, a HR pathway involving RAD51 but not DMC1 mostly replaced  
32 NHEJ. Additionally, we observed the occurrence of synaptonemal complex bridges between bivalents,  
33 most likely representing chromosome translocation events that may involve DMC1, RAD51 or 53BP1. Our  
34 results reinforce the idea that the early “meiotic” repair pathway that acts by default at the beginning of  
35 meiosis is replaced from mid pachytene onwards by a “somatic-like” repair pattern. This shift might be  
36 important to resolve DNA damage (either endogenous or exogenous) that could not be repaired by the  
37 early meiotic mechanisms, for instance those in the sex chromosomes, which lack a homologous  
38 chromosome to repair with. This transition represents another layer of functional changes that occur in  
39 meiotic cells during mid pachytene, in addition to epigenetic reprogramming, reactivation of transcription,  
40 expression of a new gene profile and acquisition of competence to proceed to metaphase.

## 41 **Author summary**

42 DNA repair is critical for both somatic and meiotic cells. During meiosis, hundreds of DNA double strand  
43 breaks (DSBs) are introduced endogenously. To repair this damage, meiotic cells use a specialized version  
44 of the homologous recombination (HR) pathway that uses specific meiotic recombinases, such as DMC1,  
45 to promote repair with the homologous chromosome instead of the sister chromatid. This process is  
46 important to ensure chromosome segregation during meiosis and, as a side consequence, increases the  
47 genetic diversity of offspring. Nevertheless, under specific circumstances, meiotic cells can use other DNA  
48 repair mechanisms such as non-homologous end joining (NHEJ), which is error-prone. We investigated the  
49 response of mouse spermatocytes to increased DNA damage caused by gamma radiation, which is  
50 commonly used in cancer therapy. We found that the excess of DSBs produced by irradiation is processed  
51 by the meiotic HR recombination pathway in spermatocytes at the early stages of first meiotic prophase.  
52 However, this response is not inducible from the mid pachytene stage onwards. From this point on,  
53 spermatocytes rely on a response that shares many features with that of somatic cells. In this response,  
54 the NHEJ pathway is first used to repair DNA damage but is subsequently replaced by a HR mechanism  
55 that does not use DMC1. Instead, it relies only on RAD51, which is known to function in both somatic and  
56 meiosis cells and, contrary to DMC1, has a preference for the sister chromatid. This switch from a meiotic  
57 to a somatic-like response is accompanied by a conspicuous change in the epigenetic response to DNA  
58 damage, reinforcing the idea that a functional transition occurs in meiotic cells during the mid pachytene  
59 stage.

60

## 61 **Introduction**

62 DNA damage response is one of the most critical processes for cell survival and proliferation. Of the  
63 different forms of DNA damage, double-strand breaks (DSBs) are by far the most harmful. DSBs can arise  
64 spontaneously as a consequence of exposure to physical and chemical agents or following replication  
65 errors. In somatic cells, two main mechanisms operate to repair DSBs [1]. Non-homologous end joining  
66 (NHEJ) is the most common mechanism, working in all phases of the cell cycle [2]. Although this pathway  
67 is quite efficient, it is also error-prone as it does not discriminate whether the two rejoined ends were the  
68 correct ones. In contrast, homologous recombination (HR) uses an intact DNA molecule as a template for  
69 repair, ensuring high fidelity of repair. However, this mechanism only acts when a DNA copy, usually the  
70 sister chromatid, is available, which only happens during the S/G<sub>2</sub> phases of the cell cycle.

71 During meiosis, homologous chromosomes undergo a series of complex processes, including  
72 pairing and synapsis, recombination and segregation. Meiotic recombination is in essence a HR DNA repair  
73 mechanism that ensures the proper segregation of chromosomes during the first meiotic division and  
74 increases genetic diversity [3,4]. Although the molecular mechanisms mediating HR in somatic and meiotic  
75 cells are similar, there are a number of differences, including the way DSBs are generated and some of the  
76 molecular components that work in their repair. In meiosis, HR begins after hundreds of DSBs are  
77 endogenously induced by Spo11 endonuclease during the leptotene stage of the first meiotic prophase  
78 [3,5,6]. The ATM kinase and the MRN protein complex (comprised of MRE11, RAD50 and NBS1) function  
79 as damage sensors by recognizing DSBs [7-9]. The MRN complex, together with other proteins (e.g. CtIP,  
80 BRCA1, BLM, EXO1, DNA2), then eliminates the covalent attachment of Spo11 and performs a 5' to 3'  
81 resection of DNA on either side of the break, which forms 3'-protruding ends of single-stranded DNA  
82 (ssDNA) [10]. The newly produced ssDNA is covered by RPA, which protects it from degradation [7]. Then,

83 the ATR-ATRIP (Ataxia Telangiectasia and Rad3-related and ATR-Interacting Protein) complex binds directly  
84 to the RPA-coated ssDNA, thus localizing the kinase ATR to DSBs [8].

85 After DNA resection, the recombinase proteins RAD51 and DMC1 replace RPA and form  
86 nucleoprotein filaments, allowing the ssDNA to invade the DNA double helix of the homologous  
87 chromosome [4,10]. Template choice for DSB repair is another specific feature of meiotic HR: it is tightly  
88 regulated to favor inter-homologue recombination and crossing-over, which ensure coordinated  
89 chromosomal disjunction at the first meiotic anaphase. DMC1, which is only expressed during meiosis,  
90 drives repair to favor non-sister chromatid donors, while RAD51, which is essential for both somatic and  
91 meiotic recombination, acts to favor sister-chromatid donors [6,11-13]. DNA contacts between  
92 homologous chromosomes can ultimately resolve as reciprocal or non-reciprocal recombination events,  
93 which lead to crossovers or gene conversion events, respectively.

94 Although HR is the main DNA repair pathway acting during meiosis, NHEJ can also be used [14].  
95 The action of NHEJ mechanisms is apparently simpler. Classical NHEJ relies on the recruitment of the  
96 Ku70/80 complex and other regulatory factors, such as 53BP1, to the site of breaks to prevent DNA  
97 resection. This is followed by the incorporation of DNA-PKcs and DNA ligase IV, which reseals the break  
98 with the help of accessory factors such as XRCC4 [7,10]. In recent years, in addition to the classical NHEJ,  
99 a variety of alternative NHEJ pathways, which use additional biochemical components, have been  
100 uncovered [10,15]. Components of the classical NHEJ pathway such as Ku70/80 and 53BP1 have been  
101 detected in meiotic cells, both in the course of normal meiosis [16] and after the exogenous induction of  
102 DNA damage [14,17]. Not surprisingly, this mechanism seems to be triggered only in the late stages of first  
103 meiotic prophase. This may be a consequence of the upregulation of HR repair during the early stages of  
104 meiosis following the endogenous production of DSBs by Spo11 and the resection of DNA that is  
105 concomitant with Spo11 removal [18]. However, coexistence of HR and NHEJ is possible during the late

106 stages of meiotic prophase to repair DNA damage that was induced by either endogenous or exogenous  
107 mechanisms. Radiation exposure experiments, for instance, have reported an increase of both 53BP1 and  
108 RAD51 levels in pachytene and diplotene spermatocytes [14,17,19,20].

109         The key event for the choice between HR and NHEJ relies on the resection of DNA around the  
110 break [2]. The production of ssDNA overhangs hampers the action of NHEJ mechanisms, which require  
111 intact ends. Although the regulation of DNA resection at DSBs is not completely clear, a reciprocal  
112 regulation of factors promoting and inhibiting resection has been reported [21]. For instance, 53BP1 has  
113 been proposed to play a key role in inhibiting resection by hampering the loading of the CtIP-BRCA1  
114 complex to the DNA, thus diverting repair to the NHEJ pathway [10,22,23]. CtIP-BRCA1, in turn, is thought  
115 to negatively regulate 53BP1 by inducing displacement of both 53BP1 and Ku70/80 from the break point  
116 and stimulating DNA resection by the MRN-(EXO1-DNA2-BLM) complex [2,24]. Interestingly, both 53BP1  
117 and BRCA1 seem to rely on ATM kinase for phosphorylation, which is necessary for their function.  
118 Additional factors, such as the action of specific CDK-cyclin complexes and the epigenetic landscape  
119 around the break point also contribute to the regulation of DNA end resection [21].

120         In addition to the biochemical interactions described above, the morphological, temporal and  
121 epigenetic scenario in which DNA repair occurs during meiosis must be considered. Synapsis, the intimate  
122 association of homologues, is mediated by a highly specialized structure called the synaptonemal complex  
123 (SC) [25]. Assembly and disassembly of the SC during the first meiotic prophase is a tightly regulated  
124 process crucial for proper chromosome recombination and segregation [26], as evidenced by the number  
125 of synapsis mutants in which recombination is disturbed, and vice versa [27-31]. Furthermore, during first  
126 meiotic prophase, the complex regulation of transcription and chromatin modifications can influence the  
127 response to DNA damage [32-34]. Most conspicuously, histone H2AX is phosphorylated to give rise to  
128  $\gamma$ H2AX, which localizes throughout the nucleus during the leptotene stage in response to DSBs [35]. This

129 contrast with the pattern of  $\gamma$ H2AX in somatic cells, where it usually forms small and discrete foci [36].  
130  $\gamma$ H2AX is involved in recruiting many DNA repair factors [5,10,35,37,38] and in the transcriptional silencing  
131 that characterizes the beginning of meiosis and sex chromosomes [33,35,39]. Notably, ATM, ATR and DNA-  
132 PKcs can all phosphorylate H2AX [10,40,41]; therefore,  $\gamma$ H2AX is a marker of both the HR and NHEJ  
133 pathways. Upon DNA repair,  $\gamma$ H2AX seems to be displaced from the chromatin and/or dephosphorylated  
134 by protein phosphatases [42-44].

135           To shed light on the complex relationships of DNA repair mechanisms acting during meiosis, we  
136 assessed DNA repair responses during mammalian male meiosis after the exogenous production of DSBs.  
137 We irradiated mice with gamma rays and then analyzed the localization and dynamics of various markers  
138 of DNA repair response, including  $\gamma$ H2AX, DMC1, RAD51, 53BP1, Ku70 and XRCC4, at different times of  
139 recovery. We have uncovered two distinct epigenetic patterns in response to DNA damage in early and  
140 late prophase-I spermatocytes: a typical meiotic one and a somatic-like one acting at early and late stages,  
141 respectively. The transition to a somatic-like response during mid pachytene coincides with the sequential  
142 cessation of the meiotic HR response at mid pachytene and the consecutive activation of NHEJ and somatic  
143 HR repair mechanisms. In addition, we report the formation of chromosome bridges between non-  
144 homologous chromosomes associated with either HR or NHEJ markers.

145

## 146 **Results**

### 147 **$\gamma$ H2AX dynamics after irradiation**

148 We first analyzed the distribution pattern of  $\gamma$ H2AX (H2AX phosphorylated at serine 139) in response to  
149 DNA damage. Phosphorylation of this histone is one of the first cytological events detected after DNA  
150 damage and has been used extensively to localize DSBs in both somatic and meiotic cells [5,10,35,36,38].  
151 Staging of spermatocytes during first meiotic prophase was made on the basis of chromosome synapsis  
152 between autosomes and the morphology of the sex chromosomes following SYCP3 immunolabeling, as  
153 previously characterized [33].

154 In control spermatocytes,  $\gamma$ H2AX is first detectable at early leptotene, when short threads of SYCP3  
155 mark the initial assembly of axial elements (AEs) along the chromosomes. At this early stage, only a few  
156 discrete  $\gamma$ H2AX foci are observed scattered throughout the nucleus (Fig 1A). During mid to late leptotene,  
157 when AEs form longer filaments,  $\gamma$ H2AX is broadly localized throughout most of the nucleus (Fig 1B). This  
158 broad nuclear distribution is maintained during early zygotene (Fig 1C), when AEs start to synapse. From  
159 mid zygotene onwards,  $\gamma$ H2AX signal decreases and, by the end of zygotene, is mainly associated with  
160 unsynapsed regions (Fig 1D). During pachytene, when homologous chromosomes are fully synapsed,  
161  $\gamma$ H2AX localizes almost exclusively on the sex chromosomes, which have extensive unsynapsed regions  
162 (Fig 1E and 2A-B). Nevertheless, large  $\gamma$ H2AX foci are sometimes observed associated to the SCs of some  
163 autosomal bivalents. These foci have been previously described [5,33] and interpreted as unrepaired DSBs  
164 that tend to disappear with pachytene progression or, alternatively, as regions of transcriptional silencing  
165 [45]. During diplotene, when homologues desynapse,  $\gamma$ H2AX remains present only on the sex  
166 chromosomes (Fig 2C).



167 In gamma-irradiated spermatocytes, visible changes in the pattern of  $\gamma$ H2AX localization are  
168 observed one hour after irradiation. In early leptotene cells,  $\gamma$ H2AX is seen throughout the nucleus, in  
169 contrast to the small scattered foci seen in controls, indicative of a massive broadly distributed DNA repair  
170 response (Fig 1F). This pattern is also observed in late leptotene, zygotene and early pachytene  
171 spermatocytes (Fig 1G-J). Changes at late leptotene and zygotene stages are less evident as  $\gamma$ H2AX is  
172 already broadly localized throughout the nucleus in control cells at these stages. This pattern indicates  
173 that cells at the beginning of meiosis up to early pachytene respond to the induction of DNA damage  
174 similarly. In contrast, the response of spermatocytes from mid pachytene onwards is rather focalized.  
175 Large  $\gamma$ H2AX foci are observed emerging from the SCs (Fig 2D-F). These kind of signals have been called  
176 large foci [5], flares [45] or eruptions [46]. The morphology of these foci resembles that found in control  
177 spermatocytes (Fig 2B) and somatic cells [36]. These results reveal the existence of morphological  
178 differences in the response to DNA damage between early and late meiotic prophase spermatocytes.

179 Irradiated spermatocytes show a clear diminution of  $\gamma$ H2AX in most stages 24 hours after  
180 treatment. Similar to control cells, early leptotene cells have a few scattered  $\gamma$ H2AX foci (Fig 1K). If we  
181 consider that meiotic progression is not greatly affected by irradiation, then cells should progress to  
182 further stages during the recovery time. Therefore, these early leptotene cells could have been at  
183 preleptotene when irradiated (see S1 Figure for an estimation of the length of each meiotic stage, based  
184 on previous reports [47,48]). In late leptotene and early-mid zygotene spermatocytes,  $\gamma$ H2AX is distributed  
185 throughout the nucleus, similar to control cells (Fig 1L-M). Likewise, the pattern of  $\gamma$ H2AX at late zygotene  
186 and early pachytene is comparable to that of the controls (Fig 1N-O), in which  $\gamma$ H2AX appears to label the  
187 unsynapsed chromosomal regions and some foci in a few chromosomes. These cells were likely irradiated  
188 at leptotene and zygotene stages, respectively, indicating that cells irradiated at early meiotic stages are  
189 able to achieve a control pattern corresponding to their stage 24 hours after irradiation. Contrastingly,  
190 cells from mid pachytene to diplotene retain several foci associated with SCs (Fig 2G-I). These differences

191 are also observed 72 hours after irradiation (Fig 1P-T and 2J-L). In this case though, cells at mid pachytene  
192 72 hours after irradiation were at an earlier pachytene stage at the time of irradiation. These cells likely  
193 had widespread localization of  $\gamma$ H2AX at an earlier stage in response to DNA damage but their  $\gamma$ H2AX  
194 pattern changes as they progress, very much like under endogenous production of DSBs. The persistence  
195 of  $\gamma$ H2AX foci, however, indicates incomplete DNA repair.

196 Notably, leptotene cells were very scarce 72 hours after irradiation. Previous reports indicated  
197 that spermatogonia are particularly sensitive to radiation [17,19,49,50]. In order to confirm apoptosis of  
198 these cells, we performed a TUNEL assay on testicular sections (S2 Fig) and observed an increase of  
199 apoptosis in specific cell populations at different recovery times. Specifically, 24 hours post irradiation, a  
200 noticeable, but not massive, increase of apoptosis is observed in spermatogonia and prophase-I  
201 spermatocytes, while at 72 hours apoptosis is mainly observed in metaphase cells. This leads us to infer  
202 that irradiation may partially ablate spermatogonia population, but probably also interrupts the normal  
203 entrance of these cells in meiosis, which explains the scarcity of leptotene cells.

204 The two patterns of response to DSBs, early and late, also appear to differ in terms of  $\gamma$ H2AX  
205 removal. Spermatocytes irradiated at late pachytene or diplotene, or those that reach these stages during  
206 recovery, remove  $\gamma$ H2AX more slowly than those irradiated at earlier stages. In order to ascertain the  
207 efficiency of DNA repair, we recorded the number of  $\gamma$ H2AX foci from mid pachytene to diplotene (S3  
208 Table) and analyzed the progression of repair by recovery time (Fig 2M) and cell stage (Fig 2N). One hour  
209 after irradiation, the number of foci increases in the three stages. The ANOVA test showed no significant  
210 differences between stages at this time. However, at 24 hours, the number of foci returns to control levels  
211 in mid pachytene spermatocytes. In contrast, late pachytene and diplotene spermatocytes still show an  
212 increased number of foci, which is maintained even 72 hours after treatment. These results support the

213 idea that  $\gamma$ H2AX removal is less efficient as cells progress to later stages of prophase-I and that the number  
214 of foci seems to reach a steady state with no significant reduction.

### 215 **Formation of chromosomal bridges**

216 One striking feature observed after irradiation is the formation of connections between non-homologous  
217 chromosomes, which can be visualized by SYCP3 immunostaining (Fig 1T, 2J and 3). Connections are only  
218 occasionally observed in control individuals (although in some mouse strains, they appear more  
219 frequently; unpublished results). Connections are observed at all post-treatment times (1, 24 and 72  
220 hours) and could be clearly identified in zygotene to diplotene spermatocytes. On the basis of their  
221 morphological appearance, we classified connections in three categories (Fig 3): 1) distal contacts, in which  
222 chromosomes interact end-to-end (Fig 3A-B); 2) interstitial contacts, in which a filament emerges from  
223 one bivalent and contacts one or more bivalents laterally (Fig 3C-F) and 3) intrachromosomal contacts, in  
224 which the connection is observed within the same bivalent (Fig 3G-I). In some cases, the SYCP3-positive  
225 filament of a bivalent seems to split into two with a thin filament, probably involving a single chromatid,  
226 providing the connection (Fig 3C). In other cases, the filament appears thicker (Fig 3D).

227 Chromosome connections can be observed between autosomal bivalents, between autosomes  
228 and sex chromosomes or between sex chromosomes. The presence of these bridges is likely not an artifact  
229 of the spreading technique as they are also observed in squashed spermatocytes (Fig 3J). Furthermore,  
230 chromosome fragments and bridges are observed during anaphase- and telophase-I (Fig 3K-L), indicating  
231 that these connections may represent chromosomal translocations. While connections between bivalents  
232 can result in a non-homologous chromosomal translocation, bridges within bivalents can potentially link  
233 the two homologous chromosomes or different parts of the same chromosome. The presence of these  
234 chromosomal aberrations at metaphase-I, which are rarely detected in the control cells, might account for  
235 the increased apoptosis observed at this stage 24 and 72 hours after treatment (S2 Fig).

236 In order to understand the dynamics of chromosome bridge formation, we quantified the number  
237 of cells showing at least one of these chromosomal connections during pachytene and diplotene (Fig 3M)  
238 (connections were more difficult to discern from chromosome tangles in earlier stages). No bridges were  
239 found in the controls. However, after irradiation, the frequency of spermatocytes bearing bridges  
240 increases from 6.48% at one hour to 9.15% at 24 hours and 24.13% at 72 hours, indicating a clear rise in  
241 the number of bridges with time. Regarding the distribution of bridges by stage and time, at 24 hours,  
242 most of the cells with bridges are at early pachytene; however, by 72 hours, the distribution is more  
243 uniform among stages.

#### 244 **Localization pattern of DMC1**

245 In order to investigate the action of HR mechanisms, we first examined the spatial and temporal  
246 localization pattern of DMC1, which is exclusively present in meiosis and acts together with RAD51 [51,52].  
247 To compare DMC1 distribution with the  $\gamma$ H2AX pattern just described, we performed triple  
248 immunostaining of SYCP3, DMC1 and  $\gamma$ H2AX. In control spermatocytes, DMC1 is first detected at the very  
249 beginning of leptotene, when AEs start to form along chromosomes. A few foci are seen scattered  
250 throughout the nucleus (Fig 4A), which are not specifically associated with either the short SYCP3  
251 fragments or the small  $\gamma$ H2AX foci already present. The presence of DMC1 foci at the beginning of  
252 leptotene suggested that they might be responding to DSBs produced by a SPO11-independent  
253 mechanism. However, their absence in SPO11 null mutants (S4 Fig) rules out this possibility. During late  
254 leptotene, many more DMC1 foci are clearly visible, and they appear to be mainly associated with  
255 chromosomal AEs (Fig 4B). During early zygotene, many DMC1 foci are still observed along both synapsed  
256 and unsynapsed chromosomal regions (Fig 4C). At late zygotene, the number of DMC1 foci decreases (Fig  
257 4D). Some foci remain associated with autosomes but they are clearly more abundant on the unsynapsed  
258 AE of the X chromosome. A single DMC1 focus is observed on the Y chromosome. During early pachytene

259 (Fig 4E), even fewer foci are visible. Although DMC1 and  $\gamma$ H2AX are co-localized on some autosomes, in  
260 many cases, DMC1 and  $\gamma$ H2AX foci are not associated with one another (see detail in Fig 4E), indicating  
261 that DMC1 localization persists after the removal of  $\gamma$ H2AX. At mid pachytene, most autosomal DMC1 foci  
262 have disappeared, though the sex chromosomes still have a high number of foci (Fig 4F). DMC1 is no longer  
263 detectable at a cytological level after mid pachytene.

264 After irradiation, a notable increase in DMC1 protein expression is observed (Fig 4G-Z), with foci  
265 associating with unsynapsed AEs during leptotene, synapsed and unsynapsed regions during zygotene and  
266 synapsed autosomes and the AE of the X chromosome from pachytene onwards. DMC1 is not detected  
267 beyond mid pachytene, indicating that this protein is not inducible by radiation exposure after this stage.  
268 Similar to control cells, some co-localization of DMC1 and  $\gamma$ H2AX is observed in irradiated pachytene cells  
269 (see details in Fig 4K and 4L). We also observed DMC1-positive filaments connecting different  
270 chromosomes. These filaments are mainly present at 24 and 72 hours after irradiation and likely represent  
271 the nucleoprotein filaments formed during the ssDNA invasion of the intact DNA copy. Although it is  
272 unclear whether these filaments join homologous or heterologous chromosomes at earlier stages (Fig 4N),  
273 by pachytene, heterologous associations are clearly observed. Indeed, some of these filaments appear to  
274 be associated with SYCP3 threads that bridge different bivalents (Fig 4W-Z), indicating a role for DMC1 in  
275 DNA repair between heterologous chromosomes under experimental conditions.

## 276 **Dynamics of DMC1 response**

277 In order to analyze the dynamics of DNA repair associated with DMC1, we scored the number of foci in  
278 control and irradiated cells at different stages. On the basis of the morphological features of SC formation  
279 and the  $\gamma$ H2AX localization pattern described above, we considered six different substages: early  
280 leptotene, mid-late leptotene, early-mid zygotene, late zygotene, early pachytene and mid pachytene. We

281 did not record the number of DMC1 foci in leptotene cells 72 hours post irradiation given the scarcity of  
282 this cell population and the occurrence of morphological abnormalities, as mentioned above.

283 Our quantitative analysis revealed some interesting features (Fig 5 and S3 Table). First, the early  
284 leptotene cell population of control spermatocytes has a low number of DMC1 foci and very low standard  
285 deviation. As described above, this population is also characterized by a few small  $\gamma$ H2AX foci. In contrast,  
286 mid-late leptotene cells show an increase in the number and standard deviation of DMC1 foci, in  
287 agreement with a previous report [53]. This stage is also associated with broad  $\gamma$ H2AX labeling, as pointed  
288 above. Peak abundance of DMC1 foci occurs during early-mid zygotene and decreases thereafter.  
289 According to the ANOVA and Tukey's multiple comparisons tests, differences between each stage and the  
290 next one are significant (Fig 5A), indicating that DMC1 distribution can be used to distinguish the cell  
291 populations of the six substages.

292 Second, as expected, the number of foci increases one hour after irradiation in most phases (Fig  
293 5). As in the control, peak abundance of DMC1 foci is observed in early-mid zygotene spermatocytes, and  
294 each stage differs significantly from the following one, excepting mid-late leptotene and early-mid  
295 zygotene. However, the number of DMC1 foci induced by irradiation differs greatly among the different  
296 meiotic stages. The increase of foci compared to control is on average 69, 144, 76, 46, 18 and 4 for each  
297 of the six substages, respectively (see S3 Table). This striking result indicates that the cell stages are not  
298 equally sensitive to irradiation or that DMC1 localization to DSBs may be differentially regulated at the  
299 different stages due to the availability of this protein or other DNA repair factors. Furthermore, in  
300 irradiated mid pachytene spermatocytes, the number of DMC1 foci did not increase significantly regardless  
301 of recovery time, indicating that DMC1 is no longer inducible at this or later stages. These results can be  
302 more easily discerned when data are grouped by cell stage instead of recovery time (Fig 5B).

303           Third, after the increase of DMC1 foci immediately after irradiation, a slow diminution is observed  
304 with recovery time for most stages; however, most did not reach control levels even after 72 hours of  
305 recovery time (Fig 5B). Nevertheless, we observed two main stage-specific features. One, early leptotene  
306 cells show control levels 24 hours later. Moreover, while the number of DMC1 foci is quite variable one  
307 hour after treatment, 24 hours later, the range of foci narrows, very much like in the control. This finding  
308 may reflect the presence of newly formed leptotene cells that had just entered meiosis. Unfortunately, we  
309 could not record the number of DMC1 foci in early leptotene spermatocytes 72 hours after irradiation  
310 owing to the scarcity of this stage; and 2) in early pachytene, the number of DMC1 foci does not decrease  
311 but rather slightly increases with time. Assuming again that irradiation does not greatly disrupt meiotic  
312 progression, cells irradiated at a particular stage would continue to advance through meiosis and be at  
313 later stages when observed 24 or 72 hours later. Therefore, we arranged the quantitative data following  
314 a putative duration of 24 hours for leptotene, zygotene and early pachytene [34,47,50] (S1 and S5 Fig).  
315 This means that a cell irradiated at early leptotene would be at late leptotene-early zygotene 24 hours  
316 later and at early pachytene 72 hours later, and so on (S5 Fig). Considering four initial cell populations  
317 (early leptotene, late leptotene, early zygotene and late zygotene), we observed that, one hour after  
318 irradiation, the number of DMC1 foci increases in all cases and, in most cases, decreases 24 and 72 hours  
319 later, indicating efficient DNA repair in all cell populations. Nevertheless, control levels of DMC1 foci are  
320 not observed even after 72 hours of recovery, indicating that irradiation leads to an accumulation of DNA  
321 repair events. This contrasts with the quick and efficient removal of  $\gamma$ H2AX at the same stages (Fig 1). The  
322 only exception are the cells that reach mid pachytene within the 72-hour period following irradiation. In  
323 this case, the levels of DMC1 did reach control levels, suggesting that DNA repair had been successfully  
324 completed in all cells. Alternatively, DMC1 might have been released from chromosomes at mid  
325 pachytene, regardless of whether repair had been completed or not.

## 326 **Localization pattern and dynamics of RAD51**

327 We then analyzed the distribution of RAD51, which acts with DMC1 in the HR pathway, in control and  
328 irradiated spermatocytes. In agreement with previous reports [51,52], we found that RAD1 has a similar,  
329 albeit not identical, distribution pattern as DMC1 during first meiotic prophase (Fig 6). During zygotene  
330 stage (Fig 6A, S6 and S7 Fig), RAD51 localizes to the AEs of chromosomes, with a peak number of foci  
331 observed mainly in early-mid zygotene, decreasing continuously thereafter. At early pachytene and later  
332 stages, RAD51 foci remain associated with some autosomal SCs but are mainly found on the unsynapsed  
333 AE of the X chromosome (Fig 6B and 6C). Most of these foci are not associated with  $\gamma$ H2AX, which at this  
334 stage is restricted to a few foci. RAD51 disappears during late pachytene (Fig 6D) and is absent at diplotene  
335 (Fig 6E). This pattern is very similar to that of DMC1; however, we observed that RAD51 remains associated  
336 with chromosomes for a longer period of time, into later pachytene stages. In order to observe this more  
337 clearly, we performed double immunostaining for both proteins (S6 and S7 Fig). During early stages of  
338 prophase-I, the localization of both proteins is almost, but not completely, identical. We noticed that not  
339 all DMC1 foci are associated with RAD51 foci and vice versa and that foci morphology can differ. More  
340 importantly, these two proteins are removed from chromosomes sequentially since the number of RAD51  
341 foci on both autosomes and sex chromosomes clearly exceeds that of DMC1 at the mid to late pachytene  
342 transition (S6E-E'' Fig). Thus, while the recruitment of RAD51 and DMC1 can be simultaneous upon the  
343 production of DSBs at the beginning of meiosis, persistent DSBs at the last stages of repair may lose DMC1  
344 but maintain RAD51, which may reflect its role in promoting inter-sister versus inter-homolog interactions  
345 for the repair of DSBs [54].

346 Similar to the results with DMC1, we observed an increase in the number of RAD51 foci after  
347 irradiation (Fig 6F-T). Although we did not quantify the distribution of RAD51 at early meiotic stages, the  
348 broad co-localization of RAD51 and DMC1 up to mid pachytene (S6 and S7 Fig) suggests that both proteins  
349 follow a very similar pattern, i.e., peaking one hour after treatment then decreasing with recovery time.



350 However, the localization patterns of these proteins are not identical. For instance, though RAD51-positive  
351 filaments bridging chromosomes are also observed (S7 Fig), they are thinner and scarcer than DMC1 ones.

352 Strikingly, after irradiation, RAD51 is observed in late pachytene and diplotene spermatocytes (Fig  
353 6I,J,N,O,S,T). Given that RAD51 is not observed at these stages in control spermatocytes, these foci must  
354 represent newly localized protein induced after irradiation. Indeed, this RAD51 population differs with the  
355 one observed at earlier stages. First, the signal strength of RAD51 on the sex chromosomes is similar to  
356 that of autosomes. Second, foci tend to be larger and sometimes irregularly shaped. Finally, while virtually  
357 all RAD51 foci observed at early stages (up to mid pachytene) are associated with the AEs or SCs, during  
358 late prophase, a significant proportion of RAD51 is detached from the SCs (Fig 6J,N,O). Most of these foci  
359 co-localize with  $\gamma$ H2AX one hour after irradiation, indicating they correspond to regions of DNA damage  
360 (Fig 6J and 6O).

361 To examine the dynamics of this late-appearing population of RAD51, we scored the number of  
362 foci present in mid pachytene to late diplotene spermatocytes (Fig 7A and 7B; S3 Table). This analysis  
363 uncovered some interesting features. First, one hour after irradiation, RAD51 increases significantly in all  
364 stages analyzed except mid pachytene. This striking result parallels the behavior of DMC1, which is also  
365 not inducible at mid pachytene, suggesting that HR repair can be compromised at this stage immediately  
366 after irradiation. The increase of RAD51 in late prophase spermatocytes is modest but significant, with no  
367 statistical differences observed among late pachytene and early and late diplotene stages. Second, after  
368 24 hours of recovery, the number of RAD51 foci is significantly higher in all cell populations, though the  
369 increase is more pronounced in late pachytene cells and conspicuously lower in diplotene cells. After 72  
370 hours of recovery, RAD51 levels remain high, though a slight decrease is observed in all stages, except mid  
371 pachytene. No statistical differences are detected between early and late diplotene, except in the number  
372 of foci at 24 hours. This difference could be caused by a small fraction of cells passing from late pachytene

373 into early diplotene during this period, resulting in a higher number of RAD51 foci in early diplotene  
374 spermatocytes. The unexpected behavior of RAD51 during mid-late pachytene and diplotene stages  
375 suggests that the HR response to induction of exogenous DSBs initially may be absent or weak but  
376 increases with time, at least until 24 hours after irradiation.

377 We were intrigued by the presence of RAD51 foci that were not associated with SCs. We analyzed  
378 the dynamics of RAD51 foci during diplotene (Fig 7C and S3 Table) and found that both SC-associated and  
379 non-associated RAD51 foci follow the same pattern, increasing one hour after irradiation, peaking 24 hours  
380 later and decreasing thereafter. We found that the number of foci associated with SCs is clearly higher in  
381 cells at early and late diplotene but that the proportion of non-associated RAD51 foci increases in late  
382 diplotene cells 24 and 72 hours after irradiation.

### 383 **Localization of NHEJ markers**

384 In order to ascertain the action of the NHEJ repair mechanism, we studied the temporal and spatial  
385 localization of different components of this pathway. We first examined the localization of Ku70, which is  
386 involved in the protection of broken DNA ends, and XRCC4, which is a ligase-IV co-factor. Immunostaining  
387 of these proteins yielded nearly identical results; therefore, we will only show the localization of XRCC4  
388 (Fig 8). Neither protein is observed during early meiotic stages in control spermatocytes (Fig 8A). At late  
389 pachytene, however, a weak signal appears throughout the nucleus (Fig 8B) and becomes more intense at  
390 diplotene (Fig 8C). At this stage, the signal appears slightly more intense over the sex chromosomes. In  
391 order to rule out the absence of XRCC4 labeling in early spermatocytes as an artifact of the spreading  
392 technique, we also immunostained testicular sections (S8 Fig). XRCC4 is absent in the basal spermatocytes  
393 of the seminiferous tubules and is only detectable in spermatocytes located in the middle of the  
394 epithelium, corresponding to late pachytene-diplotene cells. These results indicate that these components  
395 are present by default during the normal course of meiosis, in agreement with previous reports [14,16].

396 We observed a very similar pattern in irradiated spermatocytes: no signal is detected prior to late  
397 pachytene and, from this stage onwards, the proteins are distributed homogeneously throughout the  
398 nucleus (Fig 8D-L; S8 Fig). Although we did not quantify fluorescence intensity, no marked differences in  
399 the signal strengths of these proteins were observed between control and irradiated cells. Moreover,  
400 neither Ku70 nor XRCC4 accumulates at putative DSB sites after irradiation (e.g. in a pattern resembling  
401 that of  $\gamma$ H2AX). Therefore, induction of DNA damage has little to no effect on the spatial and temporal  
402 localization of Ku70 and XRCC4, consistent with these proteins being present by default at these stages.

403 We also analyzed the localization of 53BP1, which has a main role in protecting broken DNA ends  
404 from resection during NHEJ repair. In control cells, 53BP1 is absent during leptotene, zygotene and early  
405 pachytene (not shown) but present by mid pachytene (Fig 9A), accumulating over the chromatin of the  
406 sex chromosomes in the same space occupied by  $\gamma$ H2AX. 53BP1 signal is maintained during late pachytene  
407 (Fig 9B) and early diplotene (Fig 9C) but becomes weak by late diplotene. Occasionally, a weak signal is  
408 found on some autosomes.

409 After irradiation, in addition to sex chromosomes, 53BP1 localizes to the autosomes from mid  
410 pachytene up to the end of diplotene. One hour after treatment (Fig 9D-F), a large number of irregularly  
411 shaped foci are observed on the autosomes, very similar to the  $\gamma$ H2AX eruptions. Indeed, most 53BP1 foci  
412 on the autosomes co-localize with  $\gamma$ H2AX, although unassociated foci of both proteins are also observed.  
413 The same pattern is found at both 24 (Fig. 9G-I) and 72 hours after treatment (Fig 9J-L). We observed that  
414 some chromosomal bridges, which are frequent in cells after treatment, are associated with 53BP1 (Fig  
415 10J), indicating the involvement of NHEJ repair pathway proteins in this type of chromosome interaction.

416 The quantitative analysis of 53BP1 after treatment (Fig 9M-N, S3 Table) shows the dramatic  
417 increase in the number of foci one hour after irradiation in mid- and late pachytene and early diplotene  
418 spermatocytes and its sharp decline 24 and 72 hours later. This pattern clearly contrasts with and seems

419 antagonistic to that of RAD51, with NHEJ proteins acting as a fast response and HR proteins acting in two  
420 phases, weakly immediately after DNA damage and strongly 24 hours later. We also observed that late  
421 stages tend to have more 53BP1 foci, indicating stage-specific differences in the response. Nevertheless,  
422 by 72 hours after irradiation, all stages show control levels of 53BP1.

423

## 424 **Discussion**

425 The accurate repair of DNA damage is critical for the survival of cells. Meiosis is an excellent model to  
426 investigate the response of cells to genomic damage owing to the occurrence of programmed DNA DSBs.  
427 However, the response to this endogenous damage must coexist with the sporadic occurrences of  
428 exogenous DNA damage, for instance, that caused by exposure to ionizing radiation. The specific processes  
429 that occur during meiosis, with the assembly of the SC being the most relevant, work in combination with  
430 the endogenous program to bias DSB repair towards the HR pathway [14,16]. Nevertheless, at the end of  
431 first meiotic prophase, some constraints might be relaxed, allowing the operation of somatic-like  
432 mechanisms. The results presented here offer new ways to understand the interplay of these two  
433 responses including how and when this transition occurs during meiosis.

### 434 **Different stages of prophase I have different responses to DNA damage**

435 Phosphorylation of histone H2AX is one of the first key events to occur in response to DNA damage. As  
436 shown here and in previous reports, one hour after exposure to gamma radiation,  $\gamma$ H2AX levels increase  
437 during all stages of first meiotic prophase [20]. However, two types of responses can be clearly  
438 distinguished according to the cellular phase: a massive response, characterizing the early stages, in which  
439  $\gamma$ H2AX marks the entire nucleus, and a more focused response from mid pachytene to diplotene in which  
440  $\gamma$ H2AX instead localizes as large and well-defined foci. This focused response is typically found in somatic  
441 cells [36] even though, under irradiation overexposure, both somatic and meiotic cells can show a pan-  
442 nuclear response [20,55]. However, in our case, all cells were exposed to the same dose of irradiation;  
443 therefore, the differences in response are not due to dosage-dependent effects. The origin of these  
444 differences could be related, in part, to changes in chromatin configuration and transcriptional activity, as  
445 previously suggested for somatic cells [56]. Highly dynamic replacement and modification of histones and  
446 proteins associated with chromatin are known to occur during prophase-I [33,34,57-59]. Mouse

447 spermatocytes in early prophase-I are characterized by a widespread distribution of histone H3  
448 monomethylated at lysine 4 and trimethylated at lysine 9, which are both related to chromatin compaction  
449 and transcriptional repression [33,34,60]. These modifications are lost or re-localized between early and  
450 mid pachytene, concomitant with other relevant epigenetic changes, such as the incorporation of histone  
451 H1t, which is related to the competency of cells to proceed to chromatin condensation stages [57], and a  
452 general reactivation of transcriptional activity, which is accompanied by the acetylation of histone H3 and  
453 other associated factors [33,34,61,62]. Therefore, the epigenetic changes occurring in meiotic cells at this  
454 stage likely act as regulatory factors modulating the DNA damage response.

455         Changes in chromosome organization may also play a role in the shift in the DNA damage  
456 response. In *C. elegans*, changes in both chromatin conformation and organization of the SC central  
457 element are proposed to be involved in the change in the DNA damage response during the mid to late  
458 pachytene transition [63,64]. Indeed, exogenous damage can lead to desynapsis of homologous  
459 chromosomes [64]. Although no dramatic remodeling of the SC occurs in mouse spermatocytes during this  
460 transition, the gradual shortening of the SC during pachytene, which results in longer chromatin loops, is  
461 a feature that potentially resembles such reorganization and thus may change the framework in which  
462 DNA repair proteins function.

463         An additional cause of this change may be related to the different kinases that promote H2AX  
464 phosphorylation. At least two rounds of H2AX phosphorylation dependent on two different kinases have  
465 been proposed to occur in mouse meiosis: the first during leptotene involving ATM and the second at the  
466 end of zygotene involving ATR [39,46]. Our efforts to corroborate this hypothesis by immunostaining for  
467 kinases, including ATM, ATR and DNA-PK, were unsuccessful. However, indirect proof can be inferred. In  
468 this sense, ATM kinase activity seems to produce an amplification loop in the phosphorylation of H2AX  
469 that extends up to several megabases beyond the DSBs [41], whereas the phosphorylation produced by

470 ATR and DNA-PKcs entails a more focused response in which the signal is limited to areas close to DSBs  
471 [65]. Therefore, the two responses we observed with  $\gamma$ H2AX may reflect a main role of ATM at the  
472 beginning of prophase-I and a higher activity of ATR and DNA-PKcs at later stages [46]. Interestingly, the  
473 response of somatic cells to irradiation, in which most DSBs are repaired by NHEJ [66,67], usually produces  
474 discrete foci of  $\gamma$ H2AX in the nucleus [36,41], similar to those found in pachytene and diplotene  
475 spermatocytes. Therefore, it seems that early stages have a meiotic-specific  $\gamma$ H2AX response, while late  
476 stages have a repair response more similar to somatic cells (Fig 10).

477           Based on  $\gamma$ H2AX removal, the early response seems to be more efficient as cells irradiated at early  
478 stages return to control levels 24 after treatment. In contrast, cells irradiated at later meiotic stages retain  
479 a number of  $\gamma$ H2AX foci for the duration of recovery. This contradicts findings that, on the basis of the  
480 removal dynamics of several repair proteins, suggested repair of DSBs induced at early stages of meiosis  
481 is slower than those occurring at later stages [19]. Therefore, it is important to be cautious with these  
482 interpretations. We found that many of the  $\gamma$ H2AX foci observed at the different stages and recovery times  
483 are not associated with DMC1, RAD51 or 53BP1. The persistence of  $\gamma$ H2AX in late stages may not be  
484 completely related to a delay in the completion of DNA repair but instead to delayed dephosphorylation  
485 or turnover of the histone [36]. A similar persistence of  $\gamma$ H2AX foci has been also reported after etoposide-  
486 induced damage [20]. On the other hand, a substantial number of DMC1, RAD51 or 53BP1 foci are  
487 associated with chromosomes long after  $\gamma$ H2AX has been displaced. Indeed, the number of DMC1/RAD51  
488 foci in in cells irradiated at early stages is still above control levels 72 hours after irradiation (except in mid  
489 pachytene cells); this also applies for RAD51 and 53BP1 foci in late pachytene and diplotene cells,  
490 indicating the persistence of unrepaired events. Therefore, it seems that the production of exogenous  
491 DSBs challenges both early and late repair pathways during meiosis, resulting in an overall lower efficiency  
492 of meiotic repair of exogenous damage compared to somatic cells, as has been previously suggested  
493 [17,19].

494 **Response to endogenous DNA damage involves similar, but not identical, responses of DMC1**  
495 **and RAD51**

496 Our analysis of DSB repair pathways clearly indicates that HR is preeminent or exclusive at early meiotic  
497 stages, up to mid pachytene, and reveals interesting clues about the pattern of HR response under both  
498 normal and experimental situations.

499 In relation to the initiation of damage response in leptotene under normal conditions, we  
500 identified a population of early leptotene cells that is characterized by a low number of  $\gamma$ H2AX and  
501 DMC1/RAD51 foci. Then, a burst of these proteins is detected in late leptotene. Although we cannot rule  
502 out the possibility that these two patterns are just the two extremes of a linear rise of DSBs during  
503 leptotene [53], it is also possible that they represent two different physiological stages. While early DSBs  
504 are clearly SPO11-dependent, the rate in which they arise is limited, probably owing to the action of a  
505 limited number of SPO11 complexes [53,68] or to restrictions imposed by associated factors. Some  
506 proteins that stimulate Spo11 activity, like IHO1, are associated with the AEs [69]. Therefore, DSB  
507 production could be limited in a chromosomal context in which AEs have not yet formed. Given this  
508 context, these DSBs would be able to only trigger a focus-limited (somatic-like?)  $\gamma$ H2AX response. The  
509 extensive  $\gamma$ H2AX labeling of this early leptotene population after irradiation indicates that these cells are  
510 competent to display a broad (meiotic)  $\gamma$ H2AX reaction. Nonetheless, this *bona fide* meiotic response is  
511 only detected later in leptotene, once AEs have become more extended. This interpretation poses  
512 interesting questions about the transition from spermatogonia to meiosis, which includes other puzzling  
513 features like the premeiotic pairing of homologous chromosomes [70].

514 An intriguing issue arose when we compared the distribution of DMC1 and RAD51. We noticed  
515 that these two proteins tend to form mixed foci but that their localization patterns are not identical.  
516 Several studies reporting similar findings in budding yeast, plants and female mouse meiosis have



517 suggested that these proteins occupy different positions along the nucleoprotein filaments [54,71,72],  
518 perhaps performing complementary functions. More strikingly, we found that the temporal pattern of  
519 DMC1 and RAD51 do not coincide, particularly in the transition from mid to late pachytene. DMC1  
520 disappears from both autosomes and sex chromosomes at this stage, leaving only RAD51 on  
521 chromosomes. Temporal displacement between DMC1 and RAD51 loading and unloading has been also  
522 observed in plant meiosis [73]. This result may provide insight on the last stages of meiotic DNA repair  
523 pattern, particularly on the sex chromosomes. Several studies have hypothesized that DSBs on the X and  
524 Y chromosomes do not have homologous templates which can be used for repair, except obviously the  
525 pseudoautosomal region, and that repair can only be accomplished with the sister chromatid  
526 [32,35,74,75]. DMC1 may play a key role in interhomolog bias [54], such that its persistence on the sex  
527 chromosomes may explain why unresolved DSBs remain on these chromosomes long after most breaks  
528 have been repaired on the autosomes. The removal of DMC1 from sex chromosomes, and autosomes, at  
529 the mid-late pachytene stage may relax interhomolog bias, allowing RAD51 to then drive repair with the  
530 sister chromatid.

531 **Response to irradiation in early meiosis is characterized by the action of HR proteins that end**  
532 **at mid pachytene**

533 Irradiation clearly stimulates the increase in the number of DMC1 and RAD51 foci from early leptotene up  
534 to early pachytene. We did not find any markers for NHEJ at these stages. Although we cannot rule out  
535 that alternative NHEJ pathways independent of Ku70 or 53BP1 might be present, it seems that the early  
536 response is mostly mediated by HR mechanisms, consistent with the findings of other studies [16,17,19].  
537 It is reasonable to assume that induction of additional breaks will simply use machinery that is already  
538 present. Therefore, endogenous and exogenous DSBs can enter the same repair pathway. Consequences  
539 of this include, for instance, an increased number of chiasmata, as previously reported [19,76].

540 Nevertheless, this response is limited as prophase-I proceeds. The net increase of DMC1/RAD51 foci at  
541 each stage is lower as spermatocytes move to more advanced stages. Most strikingly, a meiotic HR  
542 response to exogenous DNA damage is very weak or not detected at mid pachytene, thus providing  
543 additional evidence of the functional shift of spermatocytes at this stage (Fig 10). This transition likely  
544 involves the cessation of expression of some meiotic-specific genes (like DMC1) and the initiation of a new  
545 gene expression profile [77-79]. This is interesting not only in terms of DNA repair but also in relation to  
546 the regulation of meiotic progression. Several studies have provided evidence of a pachytene checkpoint  
547 that monitors DNA repair, chromosome synapsis and other physiological processes such as sex  
548 chromosome inactivation [39,47,80-82]. Although the mechanisms that drive this checkpoint in mouse  
549 have not been completely elucidated, defective spermatocytes appear to be largely eliminated at a specific  
550 point of meiotic progression, identified as stage IV of the seminiferous epithelium in mouse, which most  
551 likely corresponds to the mid pachytene stage [47,80,83]. Once cells have cleared this checkpoint,  
552 inactivation of these surveillance mechanisms would be necessary to allow the progression of  
553 spermatocytes to later stages, allowing for instance desynapsis of chromosomes during diplotene without  
554 triggering meiotic progression arrest or inactivation of desynapsing regions. Likewise, inactivation of the  
555 early meiotic DNA damage response would be necessary after passing the checkpoint at mid pachytene,  
556 with new events of DNA damage that occur from this stage onwards being subject to new control  
557 mechanisms, as previously suggested [20]. These new mechanisms would rely on different checkpoints, as  
558 exemplified by the elimination of spermatocytes in mutant mice for late recombination proteins such as  
559 MLH1 or MLH3 at metaphase-I [84,85].

#### 560 **NHEJ response is quickly stimulated upon irradiation from mid pachytene onwards**

561 One may expect that, in the absence of a DMC1 response at mid pachytene, RAD51 takes the role of driving  
562 HR repair at this stage. As discussed above, RAD51 remains associated with chromosomes after DMC1 has

563 detached, and previous reports have indicated that RAD51 is inducible in late prophase-I after irradiation  
564 treatments [17,19,20]. Consistent with this, one hour after irradiation, we found a modest but clear  
565 increase in RAD51 from late pachytene onwards; however, the increase was not significant at mid  
566 pachytene. Instead, we observed increased levels of 53BP1 at all stages from mid pachytene to late  
567 diplotene, indicating a faster response of the NHEJ pathway at these stages. Although RAD51 levels are  
568 increased in irradiated late pachytene and diplotene spermatocytes compared to controls, the number of  
569 53BP1 foci clearly exceeds that of RAD51. This contrasts with a previous study that reported the presence  
570 of 53BP1 only after longer periods of recovery [17]. Differences in methodological approaches used to  
571 determine 53BP1 localization might account for these discrepancies.

572         The quick trigger of NHEJ in late prophase-I may be due to a change in the choice of the default  
573 mechanism for DSB repair (Fig 10). Somatic cells first attempt to use NHEJ to repair DSBs, even in the G<sub>2</sub>  
574 phase of the cell cycle when a sister chromatid is available to carry out more reliable repair by HR [2,15,86].  
575 The choice of NHEJ as the default mechanism from late pachytene onwards is illustrated by the constitutive  
576 presence of Ku70 and XRCC4 in the nucleus and the location of 53BP1 on the sex chromosomes. Therefore,  
577 as soon as new exogenous or even endogenous DNA breaks appear, this mechanism would quickly  
578 respond. This makes complete sense in terms of the biochemistry of DNA repair. Given that the choice  
579 between NHEJ or HR relies on the regulation of DNA resection around the break point [10], for which  
580 53BP1 has an inhibitory role [22,23], it is clear that NHEJ must be a first option. Otherwise, once resection  
581 has been performed, repair by this mechanism would be no longer possible. Nevertheless, it also clear that  
582 both mechanisms are acting at the same time, raising the possibility that NHEJ and HR proteins are  
583 competing for DNA repair, especially from late pachytene onwards. In any case, after 24 hours of recovery,  
584 few 53BP1 loci remain, which may be due to rapid repair by NHEJ [2], but also to competition with HR. In  
585 somatic cells, HR seems to be preeminent in regions of high transcriptional activity [56], which is indeed

586 the case of late pachytene and diplotene cells during meiosis. In any case, the increased presence of RAD51  
587 foci 24 hours after irradiation indicates that HR repair mechanisms prevail again at that time.

### 588 **Late HR response involves RAD51 only**

589 The late HR response has many differences with the early one. The most relevant is that it only involves  
590 RAD51. In the transition to a somatic-like DNA damage response, DMC1 is clearly no longer inducible, likely  
591 related to the change in gene expression pattern during pachytene [77-79]. The activity of RAD51 alone  
592 means that some of the constraints introduced by DMC1 in relation to DNA repair, such as homologous  
593 bias [6,11,12,54], would be relaxed. Therefore, this late repair could favor repair with the sister chromatid,  
594 which would be advantageous at the diplotene stage as desynapsis of chromosomes potentially hinders  
595 repair with the homologous chromosome.

596 The RAD51 foci present during the late HR response are larger. Although we do not have a clear  
597 explanation for the morphological change of RAD51 foci, differential organization of the repair machinery  
598 around the break point involving, for instance, the accumulation of several DSBs in each foci, or comprising  
599 the resection of longer DNA stretches, may account for this change, as previously suggested in *C. elegans*  
600 [63]. These foci are also correlated with the formation of smaller discrete  $\gamma$ H2AX foci, which, as mentioned  
601 above, may be due to the action of ATR or DNA-PK over ATM in the phosphorylation of H2AX, leading to a  
602 different architecture of the repair foci [41,65].

603 Finally, the finding of RAD51 foci not associated with the AEs/SCs of chromosomes is an intriguing  
604 feature. Whether RAD51 foci are always associated with AEs/SCs has been a matter of long debate [87].  
605 Current models propose that endogenous DSBs in early stages are produced either in the context of the  
606 AE or rapidly taken there by the action of regulatory factors, including MEI4, IHO1 and HORMAD1, among  
607 others [69,88]. This is probably provided by their ability to interact with SPO11 before or at the time of  
608 DSB production. We found that most DSBs induced after radiation also localize at the AEs/SCs, as revealed

609 by the pattern of DMC1/RAD51 foci and as reported in a previous study [50]. Thus, at early meiotic stages,  
610 both endogenous and exogenously induced DSBs likely rely on similar mechanisms to be taken to the  
611 chromosomal axis. However, at late stages, the situation might be different. The presence of IHO1 and  
612 HORMAD1 has been reported in diplotene cells [69,89]; however, it remains unclear whether these  
613 proteins, or others required for DSB localization at the axes, are completely functional at these stages.  
614 Partial failure of this process might explain the fraction of DSBs located far from AEs/SCs. Likewise, the  
615 progressive loss of these proteins as prophase-I proceeds may account for the increased frequency of non-  
616 associated foci in late diplotene spermatocytes compared with previous stages.

### 617 **Homologous recombination homeostasis and chromosomal bridges**

618 The appearance of chromosomal bridges involving SYCP3-positive filaments is an intriguing  
619 feature that poses a number of questions about the nature of DNA repair. The presence of chromosomal  
620 connections and fragments is commonly found in irradiation experiments [90,91]; however, they are  
621 usually observed in metaphase and do not involve SC connections. To our knowledge, our study is the first  
622 to report that interactions between non-homologous chromosomes may involve not only the DNA  
623 contacts but also the axial structures they are attached to. This contrasts with the normal interactions of  
624 endogenous DSBs, which do not involve the formation of connections between the AEs of homologous  
625 chromosomes. A more in-depth characterization of these connections is needed to better understand the  
626 organization of the SC around break points and their role in promoting, facilitating or stabilizing  
627 chromosomal links.

628 Bridges appear soon after irradiation, indicating they are part of a very fast response, and at  
629 increased frequencies with recovery times. Moreover, although we cannot rule out that some bridges are  
630 present at leptotene (see Fig. 4N), they are undoubtedly present at all stages from zygotene to diplotene.  
631 In fact, according to our quantitative analysis, bridges are more frequent in early pachytene spermatocytes

632 and less frequent in later phases. Several possible interpretations can be drawn from these results. Given  
633 that bridges are observed between non-homologous chromosomes, or between non-homologous  
634 sequences of the same chromosome (intrachromosomal junctions), one would expect that they  
635 correspond to DSBs repaired by NHEJ. However, the appearance of bridges at early stages such as zygotene  
636 and early pachytene, in which the main repair mechanism is HR, challenges this interpretation. Our  
637 immunostainings of Ku70, XRCC4 and 53BP1 indicate that NHEJ does not operate at early stages; however,  
638 alternative NHEJ mechanisms may potentially be present. Involvement of the NHEJ repair pathway in the  
639 formation of chromosomal bridges is doubtless only from mid pachytene onwards.

640           The presence of chromosomal bridges at early stages may be a consequence of the action of the  
641 HR pathway over homologous regions. This idea may seem completely counterintuitive but would be  
642 supported by the observation of DMC1/RAD51 filaments bridging non-homologous chromosomes. For HR  
643 to efficiently start, a minimum length of perfect homology is needed, which in mammals is 200-250 base  
644 pairs [10]. For this reason, repair templates are usually the sister chromatid or the homologous  
645 chromosome. However, the multitude of repeated sequences in the genome could provide sufficient  
646 homology to induce repair by HR. In the normal course of meiosis, endogenous DSBs are prevented over  
647 repeated DNA sequences. Moreover, mismatch repair mechanisms are in place to avoid recombination  
648 between highly homologous sequences of non-homologous chromosomes [92]. In addition, the number  
649 of DSBs is tightly regulated to not exceed a certain number, thus allowing mismatch repair mechanisms to  
650 function effectively [93]. Proteins like MEI4 and IHO1 seem to be involved in this limitation [69,88].  
651 However, the excess of DSBs produced by radiation may have a deregulatory effect on the control of repair  
652 mechanisms such that homology requirements may be bypassed, thus allowing repair between non-  
653 homologous chromosomes.

654           Regardless of the mechanisms used to form bridges, the final output is the production of  
655 chromosome connections that likely lead to the occurrence of translocations and fragmentation. This may  
656 cause cells to be compromised in the faithful distribution of chromosomes during the first meiotic division.  
657 Indeed, a noticeable increase of apoptosis is observed in metaphase/anaphase cells 24 and 72 hours after  
658 irradiation.

659

## 660 **Conclusions**

661 The results presented here provide new insights on the transition between different programs of DNA  
662 repair during meiosis that act in a stage-dependent manner. A switch in DNA damage repair responses  
663 during meiosis has been also reported in other animal models such as *C. elegans* [63,64] and *Drosophila*  
664 [94]. Strikingly, these transitions also occur at the mid or late pachytene stages, indicating they may  
665 represent a conserved feature of meiosis. However, since both *Drosophila* and *C. elegans* control synapsis  
666 and DNA repair differently than mammals, particularly as they lack a DMC1 orthologue, the regulation of  
667 this transition might be different.

668 The evidence presented also offers new clues about the location and dynamics of DNA repair  
669 mechanisms during meiosis and raises new questions about the differential functions performed by DMC1  
670 and RAD51. The late HR pathway very much resembles the somatic response, presenting focalized  $\gamma$ H2AX  
671 and involving only RAD51. This somatic-like response likely acts to repair DSBs that were not properly  
672 repaired by the meiotic default pathway (e.g. those on the sex chromosomes) or the occasional DNA  
673 damage that occurs after the primary phase of meiotic repair has concluded until cells start to condense  
674 chromatin and prepare for cell division. At this point, re-triggering a complex repair mechanism leading to  
675 the production of crossovers (provided chiasmata formation has been properly accomplished) would not  
676 be necessary. A simpler response using NHEJ or somatic HR would be sufficient. As previously suggested  
677 [63], this shift could simply be contributing to the maintenance of genome integrity before spermatocytes  
678 are engaged in segregating chromosomes to daughter cells.

679



## 680 **Materials and methods**

681           Adult CD1 male mice were used in this study. Animals were kept at the animal facility of the  
682 Universidad Autonoma de Madrid, following the animal care standards of the institution. All experiments  
683 were approved by the UAM Ethics Committee (certificate CEI 55-999-A045). Males were exposed to 5Gy  
684 gamma radiation in a CIS Bio International irradiator, equipped with a Cesium<sup>137</sup> source. Mice were  
685 sacrificed by cervical dislocation 1, 24 and 72 hours after irradiation and the seminiferous tubules  
686 processed as described below. Testicular samples of SPO11 knockout mice [31] were kindly shared by Dan  
687 Camerini-Otero (NIDDK, NIH, Bethesda, MD).

## 688 **Cell spreads and squashes**

689           For spermatocyte spreads, we used the procedure described by Peters and coworkers [95].  
690 Seminiferous tubules were disaggregated with forceps in a petri dish and a cell suspension was collected  
691 in phosphate buffered saline (PBS: 137 mM NaCl, 2.7 mM KCl, 10.1 mM Na<sub>2</sub>HPO<sub>4</sub>, 1.7 mM KH<sub>2</sub>PO<sub>4</sub>, pH  
692 7.4). After tubule fragments settled to the bottom of the dish, the cell suspension was transferred to a  
693 tube and centrifuged. The pellet was then resuspended in 400 µl of 100 mM sucrose. Cells were spread  
694 onto a slide submerged in 1% formaldehyde in distilled water containing 50 mM Na<sub>2</sub>B<sub>4</sub>O<sub>7</sub> and 0.15%  
695 Triton X-100 and then left to dry for two hours. Slides were subsequently washed with 0.04% Photo-Flo  
696 (Kodak) in distilled water and air-dried before being used for immunofluorescence or stored at -80°C.

697           Spermatocyte squashes were prepared as previously described [96]. Seminiferous tubules were  
698 fixed for 10 minutes in 2% formaldehyde in PBS containing 0.1 % Triton X-100. Fragments of tubules were  
699 placed on a slide coated with 1 mg/ml poly-L-lysine (Sigma) with two drops of fixative. A coverslip was put  
700 on top of the tubules and the cells were released by gently pressing the coverslip with a pencil. Finally,

701 tubules were squashed, the slide was frozen in liquid nitrogen and the coverslip removed with a blade.

702 Slides were immediately placed in PBS for further use.

### 703 **Immunofluorescence**

704 Spread and squashed slides were rinsed three times for 5 min each in PBS and incubated overnight at room

705 temperature with primary antibodies diluted in PBS. The following primary antibodies and dilutions were

706 used: mouse monoclonal anti-SYCP3 (Abcam, 97672) at 1:200; rabbit anti-SYCP3 (Abcam, 15093) at 1:100;

707 mouse monoclonal against histone H2AX phosphorylated at serine 139 ( $\gamma$ -H2AX) (Upstate, 05-636) at

708 1:1000; rabbit anti-DMC1 (Santa Cruz, SC-22768) at 1:50; rabbit anti-RAD51 (Santa Cruz SC-8349) at 1:50;

709 rabbit anti-53BP1 (Abcam 36823) at 1:100; goat anti-XRCC4 (Santa Cruz, SC-8285) at 1:100; goat anti-Ku70

710 (Santa Cruz, SC-1486) at 1:50. After incubation, slides were rinsed in PBS three times for 5 minutes each

711 and subsequently incubated with the appropriate secondary antibodies in a moist chamber at room

712 temperature for 1 h. We used anti-rabbit, anti-mouse and anti-goat secondary antibodies raised in donkey

713 and conjugated with either Alexa 350, Alexa 488, Alexa 594 (Invitrogen), DyLight 549 or DyLight 649

714 (Jackson ImmunoResearch). Slides were subsequently rinsed in PBS three times for 5 min each and

715 mounted with Vectashield (Vector). For double detection of two antibodies raised in the same species, we

716 used Fab secondary antibodies as previously described [97].

717 Observations were made on an Olympus BX61 microscope equipped with a motorized Z axis. Images were

718 captured with an Olympus DP72 digital camera using the Cell-F software (Olympus, Hamburg, Germany)

719 and processed using the public domain software ImageJ (National Institutes of Health, USA;

720 <http://rsb.info.nih.gov/ij>) and Adobe Photoshop 7.0.

### 721 **Testicular sections and TUNEL assay**

722 Testicles were fixed in cold 1% formaldehyde in PBS for 6 hours and then dehydrated and embedded in  
723 paraffin. Transverse sections (7  $\mu$ m) were cut and mounted onto slides. Slides were then deparaffinized  
724 and treated with 0.1% sodium citrate buffer containing 0.1% Triton-X 100 for 10 min at 37°C. Sections were  
725 subsequently processed for immunofluorescence as described above or for TUNEL (Roche) following  
726 manufacturer instructions. Slides were counterstained with DAPI and mounted with Vectashield.

## 727 **Statistical analysis**

728  $\gamma$ -H2AX, DMC1, RAD51 and 53BP1 foci and chromosomal bridges were scored manually and the  
729 results were compared between different cell stages and times after irradiation. At least 25 cells were  
730 scored for each protein, treatment and cell stage. For the TUNEL assay, 300 tubules were analyzed for  
731 each treatment, recording the proportion of tubules with apoptotic cells and the total number of positive  
732 cells, which were classified as spermatogonia, prophase-I and division spermatocytes owing to their size,  
733 position on the seminiferous epithelium and chromosome condensation. Data were analyzed using  
734 ANOVA and Tukey's multiple comparison tests for individual comparisons between different stages.  
735 Statistics and graphics were made using GraphPad Prism 6 or Excel software.

736

## 737 **Acknowledgements**

738           We are grateful to Dr. Dan Camerini-Otero for generously sharing samples of SPO11 knockout mice  
739 and to Dr. Monica Pradillo and Willy Baarends for their critical review of the manuscript.

740

741

## 742 References

- 743 1. Ceccaldi R, Rondinelli B, D'Andrea AD (2016) Repair Pathway Choices and Consequences at the Double-  
744 Strand Break. *Trends in cell biology* 26: 52-64.
- 745 2. Shibata A (2017) Regulation of repair pathway choice at two-ended DNA double-strand breaks.  
746 *Mutation Research/Fundamental and Molecular Mechanisms of Mutagenesis*.
- 747 3. Ehmsen KT, Heyer WD (2008) Biochemistry of Meiotic Recombination: Formation, Processing, and  
748 Resolution of Recombination Intermediates. *Genome Dyn Stab* 3: 91.
- 749 4. Krejci L, Altmannova V, Spirek M, Zhao X (2012) Homologous recombination and its regulation. *Nucleic*  
750 *Acids Res* 40: 5795-5818.
- 751 5. Chicheportiche A, Bernardino-Sgherri J, de Massy B, Dutrillaux B (2007) Characterization of Spo11-  
752 dependent and independent phospho-H2AX foci during meiotic prophase I in the male mouse. *J*  
753 *Cell Sci* 120: 1733-1742.
- 754 6. Neale MJ, Keeney S (2006) Clarifying the mechanics of DNA strand exchange in meiotic recombination.  
755 *Nature* 442: 153-158.
- 756 7. Langerak P, Russell P (2011) Regulatory networks integrating cell cycle control with DNA damage  
757 checkpoints and double-strand break repair. *Philos Trans R Soc Lond B Biol Sci* 366: 3562-3571.
- 758 8. Shiotani B, Zou L (2009) ATR signaling at a glance. *J Cell Sci* 122: 301-304.
- 759 9. Andersen SL, Sekelsky J (2010) Meiotic versus mitotic recombination: two different routes for double-  
760 strand break repair: the different functions of meiotic versus mitotic DSB repair are reflected in  
761 different pathway usage and different outcomes. *Bioessays* 32: 1058-1066.
- 762 10. Grabarz A, Barascu A, Guirouilh-Barbat J, Lopez BS (2012) Initiation of DNA double strand break repair:  
763 signaling and single-stranded resection dictate the choice between homologous recombination,  
764 non-homologous end-joining and alternative end-joining. *Am J Cancer Res* 2: 249-268.
- 765 11. La Volpe A, Barchi M (2012) Meiotic double strand breaks repair in sexually reproducing eukaryotes:  
766 we are not all equal. *Exp Cell Res* 318: 1333-1339.
- 767 12. Schwacha A, Kleckner N (1997) Interhomolog Bias during Meiotic Recombination: Meiotic Functions  
768 Promote a Highly Differentiated Interhomolog-Only Pathway. *Cell* 90: 1123-1135.
- 769 13. Cloud V, Chan Y-L, Grubb J, Budke B, Bishop DK (2012) Rad51 Is an Accessory Factor for Dmc1-Mediated  
770 Joint Molecule Formation During Meiosis. *Science* 337: 1222-1225.
- 771 14. Ahmed EA, Philippens ME, Kal HB, de Rooij DG, de Boer P (2010) Genetic probing of homologous  
772 recombination and non-homologous end joining during meiotic prophase in irradiated mouse  
773 spermatocytes. *Mutat Res* 688: 12-18.
- 774 15. Her J, Bunting SF (2018) How cells ensure correct repair of DNA double-strand breaks. *Journal of*  
775 *Biological Chemistry*.
- 776 16. Goedecke W, Eijpe M, Offenbergh HH, van Aalderen M, Heyting C (1999) Mre11 and Ku70 interact in  
777 somatic cells, but are differentially expressed in early meiosis. *Nat Genet* 23: 194-198.
- 778 17. Ahmed EA, van der Vaart A, Barten A, Kal HB, Chen J, et al. (2007) Differences in DNA double strand  
779 breaks repair in male germ cell types: lessons learned from a differential expression of Mdc1 and  
780 53BP1. *DNA Repair (Amst)* 6: 1243-1254.
- 781 18. Neale MJ, Pan J, Keeney S (2005) Endonucleolytic processing of covalent protein-linked DNA double-  
782 strand breaks. *Nature* 436: 1053-1057.
- 783 19. Schoenmakers S, Wassenaar E, van Cappellen WA, Derijck AA, de Boer P, et al. (2008) Increased  
784 frequency of asynapsis and associated meiotic silencing of heterologous chromatin in the presence  
785 of irradiation-induced extra DNA double strand breaks. *Dev Biol* 317: 270-281.
- 786 20. Matulis S, Handel MA (2006) Spermatocyte responses in vitro to induced DNA damage. *Molecular*  
787 *Reproduction and Development* 73: 1061-1072.

- 788 21. Daley JM, Niu H, Miller AS, Sung P (2015) Biochemical mechanism of DSB end resection and its  
789 regulation. *DNA Repair* 32: 66-74.
- 790 22. Bunting SF, Callen E, Wong N, Chen HT, Polato F, et al. (2010) 53BP1 inhibits homologous  
791 recombination in Brca1-deficient cells by blocking resection of DNA breaks. *Cell* 141: 243-254.
- 792 23. Panier S, Boulton SJ (2014) Double-strand break repair: 53BP1 comes into focus. *Nat Rev Mol Cell Biol*  
793 15: 7-18.
- 794 24. Guirouilh-Barbat J, Gelot C, Xie A, Dardillac E, Scully R, et al. (2016) 53BP1 Protects against CtIP-  
795 Dependent Capture of Ectopic Chromosomal Sequences at the Junction of Distant Double-Strand  
796 Breaks. *PLoS Genet* 12: e1006230.
- 797 25. Page SL, Hawley RS (2004) The genetics and molecular biology of the synaptonemal complex. *Annual*  
798 *Review of Cell and Developmental Biology* 20: 525-558.
- 799 26. Cahoon CK, Hawley RS (2016) Regulating the construction and demolition of the synaptonemal  
800 complex. *Nat Struct Mol Biol* 23: 369-377.
- 801 27. de Vries FA, de Boer E, van den Bosch M, Baarends WM, Ooms M, et al. (2005) Mouse Sycp1 functions  
802 in synaptonemal complex assembly, meiotic recombination, and XY body formation. *Genes Dev*  
803 19: 1376-1389.
- 804 28. Yuan L, Liu JG, Zhao J, Brundell E, Daneholt B, et al. (2000) The murine SCP3 gene is required for  
805 synaptonemal complex assembly, chromosome synapsis, and male fertility. *Mol Cell* 5: 73-83.
- 806 29. Revenkova E, Eijpe M, Heyting C, Hodges CA, Hunt PA, et al. (2004) Cohesin SMC1 beta is required for  
807 meiotic chromosome dynamics, sister chromatid cohesion and DNA recombination. *Nat Cell Biol*  
808 6: 555-562.
- 809 30. Baudat F, Manova K, Yuen JP, Jasin M, Keeney S (2000) Chromosome synapsis defects and sexually  
810 dimorphic meiotic progression in mice lacking Spo11. *Mol Cell* 6: 989-998.
- 811 31. Romanienko PJ, Camerini-Otero RD (2000) The mouse Spo11 gene is required for meiotic chromosome  
812 synapsis. *Mol Cell* 6: 975-987.
- 813 32. Inagaki A, Schoenmakers S, Baarends WM (2010) DNA double strand break repair, chromosome  
814 synapsis and transcriptional silencing in meiosis. *Epigenetics* 5: 255-266.
- 815 33. Page J, de la Fuente R, Manterola M, Parra MT, Viera A, et al. (2012) Inactivation or non-reactivation:  
816 what accounts better for the silence of sex chromosomes during mammalian male meiosis?  
817 *Chromosoma* 121: 307-326.
- 818 34. van der Heijden GW, Derijck AA, Posfai E, Giele M, Pelczar P, et al. (2007) Chromosome-wide  
819 nucleosome replacement and H3.3 incorporation during mammalian meiotic sex chromosome  
820 inactivation. *Nat Genet* 39: 251-258.
- 821 35. Mahadevaiah SK, Turner JM, Baudat F, Rogakou EP, de Boer P, et al. (2001) Recombinational DNA  
822 double-strand breaks in mice precede synapsis. *Nat Genet* 27: 271-276.
- 823 36. Rothkamm K, Barnard S, Moquet J, Ellender M, Rana Z, et al. (2015) DNA damage foci: Meaning and  
824 significance. *Environmental and Molecular Mutagenesis* 56: 491-504.
- 825 37. Hamer G, Roepers-Gajadien HL, van Duyn-Goedhart A, Gademan IS, Kal HB, et al. (2003) DNA double-  
826 strand breaks and gamma-H2AX signaling in the testis. *Biol Reprod* 68: 628-634.
- 827 38. Banerjee T, Chakravarti D (2011) A peek into the complex realm of histone phosphorylation. *Mol Cell*  
828 *Biol* 31: 4858-4873.
- 829 39. Turner JM, Mahadevaiah SK, Fernandez-Capetillo O, Nussenzweig A, Xu X, et al. (2005) Silencing of  
830 unsynapsed meiotic chromosomes in the mouse. *Nat Genet* 37: 41-47.
- 831 40. Durocher D, Jackson SP (2001) DNA-PK, ATM and ATR as sensors of DNA damage: variations on a  
832 theme? *Curr Opin Cell Biol* 13: 225-231.
- 833 41. Yuan J, Adamski R, Chen J (2010) Focus on histone variant H2AX: to be or not to be. *FEBS Lett* 584:  
834 3717-3724.

- 835 42. Chowdhury D, Keogh MC, Ishii H, Peterson CL, Buratowski S, et al. (2005) gamma-H2AX  
836 dephosphorylation by protein phosphatase 2A facilitates DNA double-strand break repair. *Mol Cell*  
837 20: 801-809.
- 838 43. Kinner A, Wu W, Staudt C, Iliakis G (2008) Gamma-H2AX in recognition and signaling of DNA double-  
839 strand breaks in the context of chromatin. *Nucleic Acids Res* 36: 5678-5694.
- 840 44. Svetlova MP, Solovjeva LV, Tomilin NV (2010) Mechanism of elimination of phosphorylated histone  
841 H2AX from chromatin after repair of DNA double-strand breaks. *Mutation Research/Fundamental*  
842 *and Molecular Mechanisms of Mutagenesis* 685: 54-60.
- 843 45. Moens PB, Marcon E, Shore JS, Kochakpour N, Spyropoulos B (2007) Initiation and resolution of  
844 interhomolog connections: crossover and non-crossover sites along mouse synaptonemal  
845 complexes. *Journal of Cell Science* 120: 1017-1027.
- 846 46. Bellani MA, Romanienko PJ, Cairatti DA, Camerini-Otero RD (2005) SPO11 is required for sex-body  
847 formation, and Spo11 heterozygosity rescues the prophase arrest of *Atm*<sup>-/-</sup> spermatocytes. *J Cell*  
848 *Sci* 118: 3233-3245.
- 849 47. Ashley T, Gaeth AP, Creemers LB, Hack AM, de Rooij DG (2004) Correlation of meiotic events in testis  
850 sections and microspreads of mouse spermatocytes relative to the mid-pachytene checkpoint.  
851 *Chromosoma* 113: 126-136.
- 852 48. Oakberg EF (1956) Duration of spermatogenesis in the mouse and timing of stages of the cycle of the  
853 seminiferous epithelium. *Am J Anat* 99: 507-516.
- 854 49. van der Meer Y, Huiskamp R, van der Tweel I, et al. (1992) The Sensitivity of Quiescent  
855 and Proliferating Mouse Spermatogonial Stem Cells to X Irradiation. *Radiation Research* 130: 289-  
856 295.
- 857 50. Carofiglio F, Sleddens-Linkels E, Wassenaar E, Inagaki A, van Cappellen WA, et al. (2018) Repair of  
858 exogenous DNA double-strand breaks promotes chromosome synapsis in SPO11-mutant mouse  
859 meocytes, and is altered in the absence of HORMAD1. *DNA Repair (Amst)* 63: 25-38.
- 860 51. Plug AW, Peters AH, Keegan KS, Hoekstra MF, de Boer P, et al. (1998) Changes in protein composition  
861 of meiotic nodules during mammalian meiosis. *J Cell Sci* 111 ( Pt 4): 413-423.
- 862 52. Tarsounas M, Morita T, Pearlman RE, Moens PB (1999) RAD51 and DMC1 form mixed complexes  
863 associated with mouse meiotic chromosome cores and synaptonemal complexes. *J Cell Biol* 147:  
864 207-220.
- 865 53. Cole F, Kauppi L, Lange J, Roig I, Wang R, et al. (2012) Homeostatic control of recombination is  
866 implemented progressively in mouse meiosis. *Nature cell biology* 14: 424-430.
- 867 54. Brown MS, Bishop DK (2015) DNA Strand Exchange and RecA Homologs in Meiosis. *Cold Spring Harbor*  
868 *Perspectives in Biology* 7.
- 869 55. Meyer B, Voss K-O, Tobias F, Jakob B, Durante M, et al. (2013) Clustered DNA damage induces pan-  
870 nuclear H2AX phosphorylation mediated by ATM and DNA-PK. *Nucleic Acids Res* 41: 6109-6118.
- 871 56. Aymard F, Bugler B, Schmidt CK, Guillou E, Caron P, et al. (2014) Transcriptionally active chromatin  
872 recruits homologous recombination at DNA double-strand breaks. *Nature Structural & Molecular Biology* 21: 366.
- 873
- 874 57. Cobb J, Cargile B, Handel MA (1999) Acquisition of Competence to Condense Metaphase I  
875 Chromosomes during Spermatogenesis. *Dev Biol* 205: 49-64.
- 876 58. Handel MA (2004) The XY body: a specialized meiotic chromatin domain. *Exp Cell Res* 296: 57-63.
- 877 59. Hoyer-Fender S (2003) Molecular aspects of XY body formation. *Cytogenet Genome Res* 103: 245-255.
- 878 60. van Dijk K, Marley KE, Jeong B-r, Xu J, Hesson J, et al. (2005) Monomethyl Histone H3 Lysine 4 as an  
879 Epigenetic Mark for Silenced Euchromatin in *Chlamydomonas*. *The Plant Cell Online* 17: 2439-  
880 2453.
- 881 61. Burgoyne PS, Mahadevaiah SK, Turner JM (2009) The consequences of asynapsis for mammalian  
882 meiosis. *Nat Rev Genet* 10: 207-216.

- 883 62. Monesi V (1965) Synthetic activities during spermatogenesis in the mouse RNA and protein. *Exp Cell*  
884 *Res* 39: 197-224.
- 885 63. Hayashi M, Chin GM, Villeneuve AM (2007) *C. elegans* Germ Cells Switch between Distinct Modes of  
886 Double-Strand Break Repair During Meiotic Prophase Progression. *PLoS Genet* 3: e191.
- 887 64. Couteau F, Zetka M (2011) DNA Damage during Meiosis Induces Chromatin Remodeling and  
888 Synaptonemal Complex Disassembly. *Developmental Cell* 20: 353-363.
- 889 65. Scully R, Xie A (2013) Double strand break repair functions of histone H2AX. *Mutat Res*.
- 890 66. Fattah F, Lee EH, Weisensel N, Wang Y, Lichter N, et al. (2010) Ku regulates the non-homologous end  
891 joining pathway choice of DNA double-strand break repair in human somatic cells. *PLoS Genet* 6:  
892 e1000855.
- 893 67. Rogakou EP, Boon C, Redon C, Bonner WM (1999) Megabase chromatin domains involved in DNA  
894 double-strand breaks in vivo. *J Cell Biol* 146: 905-916.
- 895 68. Lange J, Pan J, Cole F, Thelen MP, Jasin M, et al. (2011) ATM controls meiotic double-strand-break  
896 formation. *Nature* 479: 237-240.
- 897 69. Stanzione M, Baumann M, Papanikos F, Dereli I, Lange J, et al. (2016) Meiotic DNA break formation  
898 requires the unsynapsed chromosome axis-binding protein IHO1 (CCDC36) in mice. *Nature cell*  
899 *biology* 18: 1208-1220.
- 900 70. Boateng Kingsley A, Bellani Marina A, Gregoretti Ivan V, Pratto F, Camerini-Otero RD (2013)  
901 Homologous Pairing Preceding SPO11-Mediated Double-Strand Breaks in Mice. *Developmental*  
902 *Cell* 24: 196-205.
- 903 71. Kurzbauer M-T, Uanschou C, Chen D, Schlögelhofer P (2012) The Recombinases DMC1 and RAD51 Are  
904 Functionally and Spatially Separated during Meiosis in *Arabidopsis*. *The Plant Cell* 24:  
905 2058-2070.
- 906 72. Carofiglio F, Inagaki A, de Vries S, Wassenaar E, Schoenmakers S, et al. (2013) SPO11-Independent DNA  
907 Repair Foci and Their Role in Meiotic Silencing. *PLoS Genet* 9: e1003538.
- 908 73. Sanchez-Moran E, Santos J-L, Jones GH, Franklin FCH (2007) ASY1 mediates AtDMC1-dependent  
909 interhomolog recombination during meiosis in *Arabidopsis*. *Genes & Development* 21: 2220-2233.
- 910 74. Kauppi L, Jasin M, Keeney S (2012) The tricky path to recombining X and Y chromosomes in meiosis.  
911 *Ann N Y Acad Sci* 1267: 18-23.
- 912 75. Ashley T, Plug AW, Xu J, Solari AJ, Reddy G, et al. (1995) Dynamic changes in Rad51 distribution on  
913 chromatin during meiosis in male and female vertebrates. *Chromosoma* 104: 19-28.
- 914 76. Cai X, Li J, Yang Q, Shi Q (2011) Gamma-irradiation increased meiotic crossovers in mouse  
915 spermatocytes. *Mutagenesis* 26: 721-727.
- 916 77. Shima JE, McLean DJ, McCarrey JR, Griswold MD (2004) The murine testicular transcriptome:  
917 characterizing gene expression in the testis during the progression of spermatogenesis. *Biol*  
918 *Reprod* 71: 319-330.
- 919 78. da Cruz I, Rodríguez-Casuriaga R, Santiñaque FF, Farías J, Curti G, et al. (2016) Transcriptome analysis  
920 of highly purified mouse spermatogenic cell populations: gene expression signatures switch from  
921 meiotic-to postmeiotic-related processes at pachytene stage. *BMC Genomics* 17: 294.
- 922 79. Margolin G, Khil PP, Kim J, Bellani MA, Camerini-Otero RD (2014) Integrated transcriptome analysis of  
923 mouse spermatogenesis. *BMC Genomics* 15: 39.
- 924 80. Barchi M, Mahadevaiah S, Di Giacomo M, Baudat F, de Rooij DG, et al. (2005) Surveillance of different  
925 recombination defects in mouse spermatocytes yields distinct responses despite elimination at an  
926 identical developmental stage. *Mol Cell Biol* 25: 7203-7215.
- 927 81. Roeder GS, Bailis JM (2000) The pachytene checkpoint. *Trends Genet* 16: 395-403.
- 928 82. Roig I, Dowdle JA, Toth A, de Rooij DG, Jasin M, et al. (2010) Mouse TRIP13/PCH2 Is Required for  
929 Recombination and Normal Higher-Order Chromosome Structure during Meiosis. *PLoS Genetics*  
930 6: e1001062.



- 931 83. de Rooij DG, de Boer P (2003) Specific arrests of spermatogenesis in genetically modified and mutant  
932 mice. *Cytogenet Genome Res* 103: 267-276.
- 933 84. Lipkin SM, Moens PB, Wang V, Lenzi M, Shanmugarajah D, et al. (2002) Meiotic arrest and aneuploidy  
934 in MLH3-deficient mice. *Nature Genetics* 31: 385.
- 935 85. Baker SM, Plug AW, Prolla TA, Bronner CE, Harris AC, et al. (1996) Involvement of mouse Mlh1 in DNA  
936 mismatch repair and meiotic crossing over. *Nature Genetics* 13: 336.
- 937 86. Mansour WY, Schumacher S, Roskopf R, Rhein T, Schmidt-Petersen F, et al. (2008) Hierarchy of  
938 nonhomologous end-joining, single-strand annealing and gene conversion at site-directed DNA  
939 double-strand breaks. *Nucleic Acids Res* 36: 4088-4098.
- 940 87. Moens PB, Chen DJ, Shen Z, Kolas N, Tarsounas M, et al. (1997) Rad51 immunocytology in rat and  
941 mouse spermatocytes and oocytes. *Chromosoma* 106: 207-215.
- 942 88. Kumar R, Ghyselinck N, Ishiguro Ki, Watanabe Y, Kouznetsova A, et al. (2015) MEI4 – a central player  
943 in the regulation of meiotic DNA double-strand break formation in the mouse. *Journal of Cell  
944 Science* 128: 1800-1811.
- 945 89. Wojtasz L, Daniel K, Roig I, Bolcun-Filas E, Xu H, et al. (2009) Mouse HORMAD1 and HORMAD2, Two  
946 Conserved Meiotic Chromosomal Proteins, Are Depleted from Synapsed Chromosome Axes with  
947 the Help of TRIP13 AAA-ATPase. *PLoS Genet* 5: e1000702.
- 948 90. Calvente A, Santos JL, Rufas JS (2016) Do Exogenous DNA Double-Strand Breaks Change Incomplete  
949 Synapsis and Chiasma Localization in the Grasshopper *Stethophyma grossum*? *PLOS ONE* 11:  
950 e0168499.
- 951 91. Matsuda Y, Ohara H, Tobarí I (1987) Studies on radiation-induced chromosome aberrations in mouse  
952 spermatocytes II. Dose-response relationships of chromosome aberrations induced at zygotene  
953 stage in mouse primary spermatocytes following fast neutron- and <sup>60</sup>Co  $\gamma$ -irradiations. *Mutation  
954 Research/Fundamental and Molecular Mechanisms of Mutagenesis* 176: 251-257.
- 955 92. Spies M, Fishel R (2015) Mismatch Repair during Homologous and Homeologous Recombination. *Cold  
956 Spring Harbor Perspectives in Biology* 7.
- 957 93. Keeney S, Lange J, Mohibullah N (2014) Self-Organization of Meiotic Recombination Initiation: General  
958 Principles and Molecular Pathways. *Annual Review of Genetics* 48: 187-214.
- 959 94. Mehrotra S, McKim KS (2006) Temporal analysis of meiotic DNA double-strand break formation and  
960 repair in *Drosophila* females. *PLoS Genet* 2: e200.
- 961 95. Peters AH, Plug AW, van Vugt MJ, de Boer P (1997) A drying-down technique for the spreading of  
962 mammalian meiocytes from the male and female germline. *Chromosome Res* 5: 66-68.
- 963 96. Page J, Suja JA, Santos JL, Rufas JS (1998) Squash procedure for protein immunolocalization in meiotic  
964 cells. *Chromosome Res* 6: 639-642.
- 965 97. Page J, Berrios S, Rufas JS, Parra MT, Suja JA, et al. (2003) The pairing of X and Y chromosomes during  
966 meiotic prophase in the marsupial species *Thylamys elegans* is maintained by a dense plate  
967 developed from their axial elements. *J Cell Sci* 116: 551-560.

968

969

970

## 971 **Figure legends**

972 **Figure 1. Pattern of  $\gamma$ H2AX after irradiation in early prophase mouse spermatocytes.** SYCP3 (green) and  
973  $\gamma$ H2AX (blue) at different stages of prophase I by recovery time after irradiation. (A-E) Control. (A) Early  
974 leptotene.  $\gamma$ H2AX localizes as small scattered foci over the short threads of forming AEs. (B) Mid-late  
975 leptotene. AEs are more extended and now a massive  $\gamma$ H2AX signal covers the nucleus. This pattern is also  
976 found in early zygotene (C), when AEs are completely formed and homologues start to synapse. (D) Late  
977 zygotene. Homologous chromosomes have nearly completed synapsis.  $\gamma$ H2AX signal still occupies large  
978 chromatin regions, mostly on the unsynapsed autosomes and the X chromosome (X). The Y chromosome  
979 (Y) is usually devoid of massive  $\gamma$ H2AX labeling. (E). Early pachytene. Autosomes are completely synapsed,  
980 whereas sex chromosomes show a variable degree of synapsis.  $\gamma$ H2AX extends over both sex  
981 chromosomes (X and Y) and regions of chromatin around some autosomes (arrows). (F-J) 1 hour of  
982 recovery. Increased  $\gamma$ H2AX signal is observed in the nucleus of spermatocytes from early leptotene to early  
983 pachytene. The signal covers the entire nucleus at all the stages, contrasting with the pattern of control  
984 cells. (K-O) 24 hours of recovery. There is an evident decrease in the amount of  $\gamma$ H2AX in early leptotene,  
985 late zygotene and early pachytene spermatocytes, comparable to the controls.  $\gamma$ H2AX localizes around the  
986 sex chromosomes, and some foci present in autosomes (arrows). (P-T) 72 hours of recovery. A pattern  
987 analogous to that at 24 hours is found. Chromosomal connections involving SYCP3 are observed between  
988 some bivalents (arrowhead).

989

990 **Figure 2. Pattern of  $\gamma$ H2AX after irradiation in late prophase mouse spermatocytes.** SYCP3 (green) and  
991  $\gamma$ H2AX (blue) at different stages of prophase-I by recovery time after irradiation. (A-C) Control.  $\gamma$ H2AX  
992 appears around the sex chromosomes (X and Y) in mid pachytene (A), late pachytene (B) and diplotene  
993 (C). Occasionally, some small foci remain associated with autosomes (arrowheads). (D-F). 1 hour of

994 recovery. In addition to the sex chromosomes,  $\gamma$ H2AX localizes on the autosomes as large foci that emerge  
995 from the SCs (arrowheads) at all three stages. (G-I). 24 hours of recovery. All stages show a visible decrease  
996 in the amount of  $\gamma$ H2AX. In mid pachytene cells (G),  $\gamma$ H2AX foci are almost absent yet many foci are still  
997 present in late pachytene (H) and diplotene (I) cells. (J-L). 72 hours of recovery. The pattern is similar to 24  
998 hours; some foci (arrowheads) remain present in late pachytene (K) and diplotene (L) cells. Some  
999 chromosomal connections are visible and appear to involve  $\gamma$ H2AX signals (arrows). (M) Dotplot of the  
1000 number of  $\gamma$ H2AX foci in spermatocytes grouped by recovery time. The increase in the number of foci is  
1001 evident 1 hour after irradiation. ANOVA analysis showed no statistical differences at this time between  
1002 the three stages analyzed ( $p=0.22$ ). Tukey's multiple comparisons test for individual comparisons between  
1003 different stages showed no statistical differences. 24 hours after irradiation, a reduction in the number of  
1004 foci is observed at all stages, but now statistical differences between stages are observed (ANOVA  
1005  $p\leq 0.0001$ ). Individual comparisons indicate the existence of differences between all stages. An analogous  
1006 situation is found 72 hours after irradiation (ANOVA  $p\leq 0.0001$ ). (N) Dotplot of the number of  $\gamma$ H2AX foci  
1007 in spermatocytes grouped by stage. While mid pachytene cells return to levels similar to the control 24  
1008 hours after irradiation ( $p\geq 0.05$ ), late pachytene and diplotene do not at any time after irradiation. MP: mid  
1009 pachytene; LP: late pachytene; D: diplotene; ns: non-significant; \*:  $p\leq 0.05$ ; \*\*:  $p\leq 0.01$ ; \*\*\*:  $p\leq 0.001$ ; \*\*\*\*:  
1010  $p\leq 0.0001$ .

1011

1012 **Figure 3. Types of chromosomal bridges.** SYCP3 protein in green. (A-I) Spread spermatocytes at pachytene,  
1013 except (G), which is at zygotene. (A) Distal junction between two autosomes. (B) Distal junction between  
1014 an autosome and a sex chromosome, in this case the X. (C-D) Interstitial junctions between autosomal  
1015 bivalents. In (C) a bivalent with two bridges, each contacting a different bivalent, is shown. In the inset, a  
1016 higher power view of one of the bridges is shown. The lateral element of the homologue involved in the

1017 bridge is split into two filaments. One filament remains associated with the homologous chromosome and  
1018 the other is linked to the chromosome of the other bivalent. In (D) two bivalents are sharing a bridge. In  
1019 this case, the bridge is a whole counterpart, which has invaded the other bivalent. A higher power view of  
1020 the bridge is shown in the inset. (E) Interstitial junctions between an autosomal bivalent and the X  
1021 chromosome. In (F) a bridge is formed between an autosomal bivalent and the Y chromosome. (G)  
1022 Chromosomal bridge within an autosomal bivalent. (H) Chromosomal bridge within the X chromosome. (I)  
1023 Chromosomal bridge within the Y chromosome. (J-L) Squashed spermatocytes. DNA was counterstained  
1024 with DAPI and false colored in red. (J) Bridges are seen in 3-dimension conserved cells. During anaphase-I  
1025 (K) and telophase-I (L), chromosomal fragments and connections (arrows) are observed. (M). Graph  
1026 showing the frequency of cells showing at least one bridge at the different cell stages of prophase-I and at  
1027 the different time points after irradiation. The number of cells with bridges increases with recovery time.  
1028 Chromosomal connections are especially represented in early pachytene cells. n = total number of cells  
1029 analyzed.

1030

1031 **Figure 4. Pattern of DMC1 at different stages of prophase-I by recovery time after irradiation.** SYCP3  
1032 (red),  $\gamma$ H2AX (blue) and DMC1 (green). (A-F) Control. (A) Early leptotene. A few small foci of DMC1 appear  
1033 distributed throughout the nucleus; however, they do not seem to specifically co-localize with SYCP3 or  
1034  $\gamma$ H2AX. (B) Mid-late leptotene. DMC1 foci are more abundant and now mostly associated with short SYCP3  
1035 filaments. (C). Early-mid zygotene. DMC1 foci are very abundant over the formed AEs, some of which are  
1036 undergoing synapsis. (D). Late zygotene. DMC1 foci are located over both synapsed and unsynapsed  
1037 chromosomes. Some signal co-localizes with remaining clouds of  $\gamma$ H2AX, while others do not. The X  
1038 chromosome (X) appears coated with many foci, while only a single focus is seen on the Y chromosome  
1039 (Y). Gradually, DMC1 foci disappear during early pachytene (E) and mid pachytene (F), but remain on the

1040 sex chromosomes and some autosomes. Only occasionally do some of these DMC1 foci co-localize with  
1041  $\gamma$ H2AX (see detail in E). (G-L) 1 hour of recovery. The number of DMC1 foci increases at all stages from  
1042 leptotene to early pachytene. At early leptotene (G), DMC1 coincides with the increase and spread of  
1043  $\gamma$ H2AX to the whole nucleus. The number of DMC1 foci is clearly higher than in the control shown in A. No  
1044 conspicuous differences in the pattern of DMC1 are observed at late leptotene (H) or zygotene (I-J). The Y  
1045 chromosome still shows a single DMC1 focus. In early (K) and mid pachytene (L) spermatocytes, DMC1 is  
1046 observed on autosomes and sex chromosomes. Again, DMC1 foci may co-localize or not with  $\gamma$ H2AX.  
1047 Enlarged views of some bivalents (arrows) are shown as insets in panels K and L. Chromosomal bridges are  
1048 also found (arrowheads). (M-R) 24 hours of recovery. The distribution of  $\gamma$ H2AX resembles that of control  
1049 cells at all stages but the number of DMC1 foci seems reduced compared with cells 1 hour after irradiation.  
1050 In some cells DMC1 appears to form filaments, sometimes joining AEs together (see arrowheads and detail  
1051 in N). (S-Z). 72 hours of recovery. Leptotene cells (S-T) are found at a very low frequency and usually  
1052 include morphological distortions. The morphological features of cells from zygotene to mid pachytene  
1053 are similar to those found at 24 hours. Again, small DMC1 filaments appear on the chromosomes. These  
1054 filaments seem to occasionally mediate the formation of bridges between two bivalents (arrowheads and  
1055 details in W and Z); in some cases,  $\gamma$ H2AX signal is associated with bridges (Z).

1056

1057 **Figure 5. Dotplot representation of DMC1 foci distribution.** (A) Analysis of DMC1 distribution by time of  
1058 recovery. Six substages were considered (EL: early leptotene; LL: mid-late leptotene; EZ: early-mid  
1059 zygotene; LZ: late zygotene; EP: early pachytene; MP: mid pachytene). The six populations, including early  
1060 leptotene, are clearly distinguishable in the control. A low number of foci is found in EL cells but numbers  
1061 increase in LL, peak in EZ and then gradually decrease in LZ, EP and MP cells. ANOVA analysis showed  
1062 statistical differences ( $p \leq 0.0001$ ) for the control and the three recovery times, and Tukey's multiple

1063 comparisons test for individual comparisons between different stages showed statistical differences in all  
1064 cases, except between LL and EZ 1 hour after irradiation (ns: non-significant; \*:  $p \leq 0.05$ ; \*\*:  $p \leq 0.01$ ; \*\*\*:  
1065  $p \leq 0.001$ ; \*\*\*\*:  $p \leq 0.0001$ ). (B) Analysis of DMC1 distribution by cell stage. ANOVA analysis showed that the  
1066 number of DMC1 foci increased at all stages after irradiation ( $p \leq 0.0001$ ) except mid pachytene ( $p = 0.89$ ).  
1067 The increase of DMC1 foci observed 1 hour after irradiation compared to control is lower as cells are in  
1068 more advanced stages, and no increase is found at mid pachytene. Likewise, differences in the number of  
1069 foci between 1 and 24 hours, or between 24 and 72 hours, become less or not significant as cells are in  
1070 later stages. Nevertheless, control levels in terms of number of foci were not observed for any of the  
1071 stages, even after 72 hours of recovery, except obviously mid pachytene. Tukey's multiple comparisons  
1072 test for individual comparisons (ns: non-significant; \*:  $p \leq 0.05$ ; \*\*:  $p \leq 0.01$ ; \*\*\*:  $p \leq 0.001$ ; \*\*\*\*:  $p \leq 0.0001$ ).

1073

1074 **Figure 6. Pattern of RAD51 at different stages of prophase-I by different recovery time after irradiation.**  
1075 SYCP3 (red),  $\gamma$ H2AX (blue) and RAD51 (green). (A-F) Control. (A) Late Zygotene. RAD51 foci are found in  
1076 the non-synaptic AEs, which are also labeled with  $\gamma$ H2AX, some synapsed autosomes and the sex  
1077 chromosomes (X and Y). During early (B) and mid (C) pachytene, fewer RAD51 foci are observed. Some  
1078 remain on the autosomes, but most are in the non-synapsed region of the X chromosome. RAD51 does  
1079 not appear during the late pachytene (D) and diplotene (E). (F-J) 1 hour of recovery. Irradiation induces  
1080 RAD51 in zygotene (F) and early pachytene (H) spermatocytes. RAD51 can still be detected in late  
1081 pachytene (I) and diplotene (J) spermatocytes. Most RAD51 foci are located over the AEs or SCs (white  
1082 arrows). Insets show enlarged views of RAD51 foci co-localizing with  $\gamma$ H2AX (white arrowheads), RAD51  
1083 foci alone (green arrowheads) and  $\gamma$ H2AX foci alone (blue arrowheads). Some RAD51 foci are clearly  
1084 detached from the AEs or SCs (green arrows in J). (K-O) 24 hours of recovery. RAD51 coincides with  $\gamma$ H2AX  
1085 during zygotene (K), while at later stages (L-O), co-localization of the two signals does not always occur

1086 (see detail in N). In late pachytene (N) and diplotene (O) spermatocytes, RAD51 foci are more abundant  
1087 than at 1 hour. Foci are also larger. Green arrows indicate RAD51 foci not associated with SCs. (P-T) 72  
1088 hours of recovery. The pattern is similar to the results obtained after 24 hours of recovery. Most RAD51  
1089 foci are large and coincide with  $\gamma$ H2AX during late pachytene (S) and diplotene (T).

1090

1091 **Figure 7. Dotplot representation of RAD51 foci distribution.** (A) Analysis of RAD51 distribution by recovery  
1092 time. Four substages were considered (MP: mid pachytene; LP: late pachytene; ED: early diplotene; LD:  
1093 late diplotene). ANOVA analysis showed statistical differences ( $p \leq 0.0001$ ) for the control and the three  
1094 recovery times. In the control, MP cells have a high number of RAD51 foci but later-staged cells have little  
1095 to none. A similar increase in the number of RAD51 foci is observed from LP to LD 1 hour after irradiation.  
1096 Tukey's multiple comparisons test for individual comparisons showed statistical differences between MP  
1097 and the rest of the stages, and also between LP and LD. Twenty-four hour after irradiation, the increase in  
1098 the number of RAD51 is more obvious at all stages, while 72 hours after irradiation, the number of foci  
1099 decreases from LP to LD. (B) Analysis of RAD51 distribution by cell stage. The number of RAD51 foci  
1100 increases significantly in cells at all stages after irradiation ( $p \leq 0.0001$ ). However, according to Tukey's test,  
1101 the number of foci in irradiated mid pachytene cells 1 hour after irradiation is not significantly different  
1102 from control cells. At 24 hours, the number of foci increases in mid pachytene cells and remains stable at  
1103 72 hours. This distribution departs from the pattern observed in cells at other stages, in which RAD51  
1104 increases slightly at 1 hour, peaks at 24 hours and then decreases at 72 hours. (ns: non-significant; \*:  
1105  $p \leq 0.05$ ; \*\*:  $p \leq 0.01$ ; \*\*\*:  $p \leq 0.001$ ; \*\*\*\*:  $p \leq 0.0001$ ). (C). Analysis of RAD51 foci associated (ON) or not  
1106 associated (OFF) with SCs at early and late diplotene. The distribution of both kinds of foci is similar,  
1107 increasing at 1 hour, peaking at 24 hours and decreasing at 72 hours. Notably, the proportion of foci not  
1108 associated with SCs (OFF) is higher in late diplotene spermatocytes.

1109

1110 **Figure 8. Distribution of NHEJ markers at different stages of prophase-I by recovery time after**  
1111 **irradiation.** SYCP3 (green) and XRCC4 (red) in late prophase-I spermatocytes. (A-C) Control. XRCC4 is  
1112 absent up to mid pachytene (A). At late pachytene (B), a faint signal is observed in the nucleus, which  
1113 becomes more intense at diplotene (C). The signal appears more concentrated on the sex chromosomes  
1114 (XY). (D-F) 1 hour, (G-I) 24 hours and (J-L) 72 hours after irradiation. The localization pattern of XRCC4 at  
1115 each stage is almost identical. Foci do not form at any stage or recovery time.

1116

1117 **Figure 9. Pattern of 53BP1 at different stages of prophase-I by recovery time after irradiation.** SYCP3  
1118 (red),  $\gamma$ H2AX (blue) and 53BP1 (green). (A-C) Control. 53BP1 is first detected at mid pachytene (A) around  
1119 the sex chromosomes and is maintained during late pachytene (B) and diplotene (C). During diplotene, the  
1120 signal weakens, becoming no longer detectable by the end of this stage. The 53BP1 signal co-localizes with  
1121  $\gamma$ H2AX around the sex chromosomes, X and Y. (D-F) 1 hour of recovery. From mid pachytene (D) onwards,  
1122 a large number of 53BP1 foci appear on the autosomes as diffuse clouds. The 53BP signal is similarly  
1123 maintained in late pachytene (E) and diplotene (F) spermatocytes, although foci become smaller as  
1124 prophase-I progresses. Arrows indicate the bivalents shown in details. These 53BP1 signals largely coincide  
1125 those of  $\gamma$ H2AX (red arrowheads), although  $\gamma$ H2AX foci without 53BP1 are also present (blue arrowheads)  
1126 (see detail in E). (G-I) 24 hours of recovery. A noticeable decrease in the number of 53BP1 and  $\gamma$ H2AX foci  
1127 occurs relative to the 1-hour time point. In some cases, these foci coincide with those of  $\gamma$ H2AX (red  
1128 arrowhead in left detail in H) and in others they do not (blue arrowhead right detail in H). (J-L) 72 hours of  
1129 recovery. The number and distribution of 53BP1 and  $\gamma$ H2AX foci are similar to those at 24 hours. The  
1130 presence of two interstitial bridges between autosomal bivalents (arrows) can be more clearly seen in the  
1131 enlarged details in (J).  $\gamma$ H2AX is observed on one of the bridges (right), whereas both  $\gamma$ H2AX and 53BP1



1132 are co-localized on the other (left). (M) Dotplot of the number of 53BP1 foci in spermatocytes grouped by  
1133 recovery times. Three substages were considered (MP: mid pachytene; LP: late pachytene; ED: early  
1134 diplotene). Increased numbers of foci are evident 1 hour after irradiation. ANOVA analysis showed  
1135 statistical differences at this time between the three stages analyzed ( $p \leq 0.0001$ ). Tukey's multiple  
1136 comparisons test for individual comparisons between different stages showed no statistical differences  
1137 between LP and ED cells. A reduction is observed in the number of foci in cells at all stages 24 hours after  
1138 irradiation. An analogous situation is found 72 hours after irradiation. (N) Dotplot of the number of 53BP1  
1139 foci in spermatocytes grouped by stage. Cells at all stages return to control levels 72 hours after irradiation.  
1140 ns: non-significant; \*:  $p \leq 0.05$ ; \*\*:  $p \leq 0.01$ ; \*\*\*:  $p \leq 0.001$ ; \*\*\*\*:  $p \leq 0.0001$ .

1141

1142 **Figure 10. Model for the transition of the DNA damage response during meiosis.** The early (meiotic)  
1143 response works from early leptotene up to mid pachytene and is characterized by the action of HR  
1144 mechanisms. This is the default pathway, likely due to the programmed resection of DNA upon SPO11  
1145 removal, which would hamper the action of NHEJ mechanisms. The meiotic response involves broad  
1146 phosphorylation of  $\gamma$ H2AX in the nucleus, likely in association with changes in chromatin organization,  
1147 epigenetic modifications and transcriptional silencing, characteristic features of spermatocytes at these  
1148 stages. DMC1 and RAD51 work together during this early response. DMC1 is removed first, leaving only  
1149 RAD51 at the last stages of this response, which may affect interhomolog bias in the repair of DSBs.  
1150 Induction of additional exogenous DSBs (but also potentially spontaneous, SPO11-independent ones)  
1151 triggers an identical meiotic response, marked by the massive  $\gamma$ H2AX localization throughout the nucleus  
1152 and the increase of DMC1 and RAD51 in cells at all stages up to mid pachytene. Although  $\gamma$ H2AX is quickly  
1153 removed, many unresolved DNA damage intermediates accumulate even after long periods of recovery,  
1154 indicating that this mechanism is not completely efficient. The dual late response very much resembles

1155 the response of somatic cells, including the appearance of discrete  $\gamma$ H2AX foci. NHEJ is the first mechanism  
1156 activated in this late somatic-like response, triggered soon after induction of DSBs from mid pachytene  
1157 onwards. Some factors, like 53BP1, may already be present and localized on the sex chromosomes, with  
1158 others (Ku70, XRCC4) appearing by default during late pachytene. This mechanism can quickly respond to  
1159 DNA damage and, under normal conditions, likely resolve most, if not all, endogenously generated DSBs.  
1160 However, after the induction of an exceeding number of DSBs, the initial NHEJ response is replaced by a  
1161 HR one, involving only RAD51. Although this somatic-like response is less efficient in removing  $\gamma$ H2AX than  
1162 the early meiotic response, its overall repair efficiency is probably similar. Indeed, lower accumulation of  
1163 unresolved intermediates is observed for this late response after long periods of recovery. The transition  
1164 between these two DNA damage responses clearly occurs during mid pachytene, when the meiotic  
1165 response is no longer inducible and the somatic-like one becomes available. This transition indicates a  
1166 possible physiological shift in meiotic cells as they prepare for further stages of first meiotic division and,  
1167 more relevantly, chromosome segregation.

1168

1169

## 1170 **Supplementary information**

1171 **S1 Figure. Estimated length of meiotic stages**, based on previous reports by Oakberg [48] and Ashley and  
1172 coworkers [47].

1173 **S2 Figure. Apoptosis induction after irradiation.** TUNEL (green) and DAPI (blue). (A-C) Section of a  
1174 seminiferous tubule 24 hours after treatment. Apoptotic cells are found in both the basal (arrows) and  
1175 interstitial (arrowheads) strata of the seminiferous epithelium. (D-F) Section of a seminiferous tubule 72  
1176 hours after treatment showing apoptotic cells at metaphase or anaphase. (G-I) Detail of apoptotic  
1177 metaphase and anaphase cells 72 hours after irradiation. Note the presence of chromatin bridges between  
1178 cell poles in the anaphase cell (arrow in G). (J). Quantitative distribution of apoptotic cells. Total number  
1179 of apoptotic cells were recorded in 300 seminiferous tubules. Peak apoptosis is observed 24 after  
1180 irradiation with 58.6% of tubules showing at least one apoptotic cell. At this time, spermatogonia are the  
1181 most affected population, followed by spermatocytes and cells undergoing division. After 72 hours of  
1182 recovery, the total number of apoptotic cells decreases with only 27.6% of tubules showing apoptotic cells.  
1183 At this recovery time, the majority of cells undergoing apoptosis are at metaphase or anaphase.

1184 **S3 Table.** Quantitative data for all proteins analyzed and chromosomal bridges organized by cell stage and  
1185 recovery time.

1186 **S4 Figure. DMC1 localization in SPO11 knockout mice.** (A-C) SYCP3 (green) and (A'-C') DMC1 (red) at early  
1187 leptotene (A, A'), mid leptotene (B, B') and zygotene-like (C, C'). No specific signal of DMC1 is detected at  
1188 any of the stages analyzed.

1189 **S5 Figure. Quantitative analysis of DMC1 dynamics during early prophase-I.** Cell progression during  
1190 prophase-I and duration of each stage is represented in the series of images at the top. Distribution of  
1191 DMC1 foci are arranged according to the recovery time after irradiation and the putative stages that cells

1192 should have reached at that time, provided that meiotic progression was not affected by the treatment.  
1193 We arranged four cell populations: early leptotene, mid-late leptotene, early-mid zygotene and late  
1194 zygotene. For each case, irradiated cells were compared with their respective control counterparts and  
1195 statistical differences indicated (ANOVA and Tukey's multiple comparisons test). Only cells that advanced  
1196 to mid pachytene during the recovery time, i.e., those that were irradiated at early or late zygotene, show  
1197 control levels of DMC1 after 72 hours of recovery. This is mostly due to the fact that DMC1 is not inducible  
1198 at this stage and/or the programmed displacement of DMC1 from the chromosomes, regardless of  
1199 whether repair had been completed or not. EL: early leptotene; LL: mid-late leptotene; EZ: early-mid  
1200 zygotene; LZ: late zygotene; EP: early pachytene; MP: mid pachytene; ns: non-significant; \*:  $p \leq 0.05$ ; \*\*:  
1201  $p \leq 0.01$ ; \*\*\*:  $p \leq 0.001$ ; \*\*\*\*:  $p \leq 0.0001$ .

1202 **S6 Figure. Localization of DMC1 and RAD51 in control spermatocytes.** SYCP3 (blue), DMC1 (green) and  
1203 RAD51 (red). Merge of the (A-F) SYCP3 and DMC1 channels, (A'-E') SYCP3 and RAD51 channels and (A''-  
1204 F'') SYCP3, DMC1 and RAD51 channels. DMC1 and RAD51 are largely co-localized in foci observed from  
1205 early leptotene to mid pachytene (A-D). However, DMC1 and RAD51 signal on these foci are usually not  
1206 identical in size or shape. Moreover, there are some instances in which either of the two proteins seem to  
1207 form single foci. At mid-late pachytene (E-E''), DMC1 is no longer present on the chromosomes, but RAD51  
1208 is still abundantly observed on both autosomes and sex chromosomes (X and Y). By late pachytene (F-F''),  
1209 neither DMC1 nor RAD51 are observed.

1210 **S7 Figure. Localization of DMC1 and RAD51 at different stages of prophase-I by different recovery time**  
1211 **after irradiation.** SYCP3 (blue), DMC1 (green) and RAD51 (red). (A-F) Control. The cells shown in A-D are  
1212 the same as those shown in S6 Figure. (G-L) 1 hour after irradiation. As shown in Figures 4 and 6, both  
1213 DMC1 and RAD51 become more abundant after irradiation with both proteins being present in the same  
1214 foci in most cases; however, the overlap in signals is not identical in many instances as the sizes and shapes

1215 of foci of the individual proteins differ. From late pachytene onwards, only RAD51 foci are detectable. (M-  
1216 R) An analogous result is found 24 after irradiation. Filaments containing both DMC1 and RAD are observed  
1217 in some spermatocytes (arrows in M).

1218 **S8 Figure. Localization of XRCC4 in testicular sections.**  $\gamma$ H2AX (green), XRCC4 (red) and DAPI (blue) in  
1219 seminiferous tubules at equivalent developmental stages. (A-D) Control. Basal layers of spermatocytes,  
1220 corresponding to leptotene and zygotene, are broadly stained with  $\gamma$ H2AX and devoid of XRCC4.  
1221 Spermatocytes in the interstitial strata of the epithelium show an inverse labeling pattern, with abundant  
1222 XRCC4 and nearly no  $\gamma$ H2AX staining. (E-H). 1 hour after irradiation. Cells showing broad  $\gamma$ H2AX labeling in  
1223 the basal strata are again devoid of XRCC4. In contrast, spermatocytes stained with XRCC4 now also have  
1224 an abundance of  $\gamma$ H2AX localized foci, corresponding to the late  $\gamma$ H2AX response. No noticeable increase  
1225 in the intensity of XRCC4 labeling is observed. (I-L) 24 hours and (M-P) 72 hours after irradiation.  $\gamma$ H2AX  
1226 tend to return to control levels. No variation of XRCC4 labeling is observed after longer periods of recovery.  
1227

1228

FIGURE 1

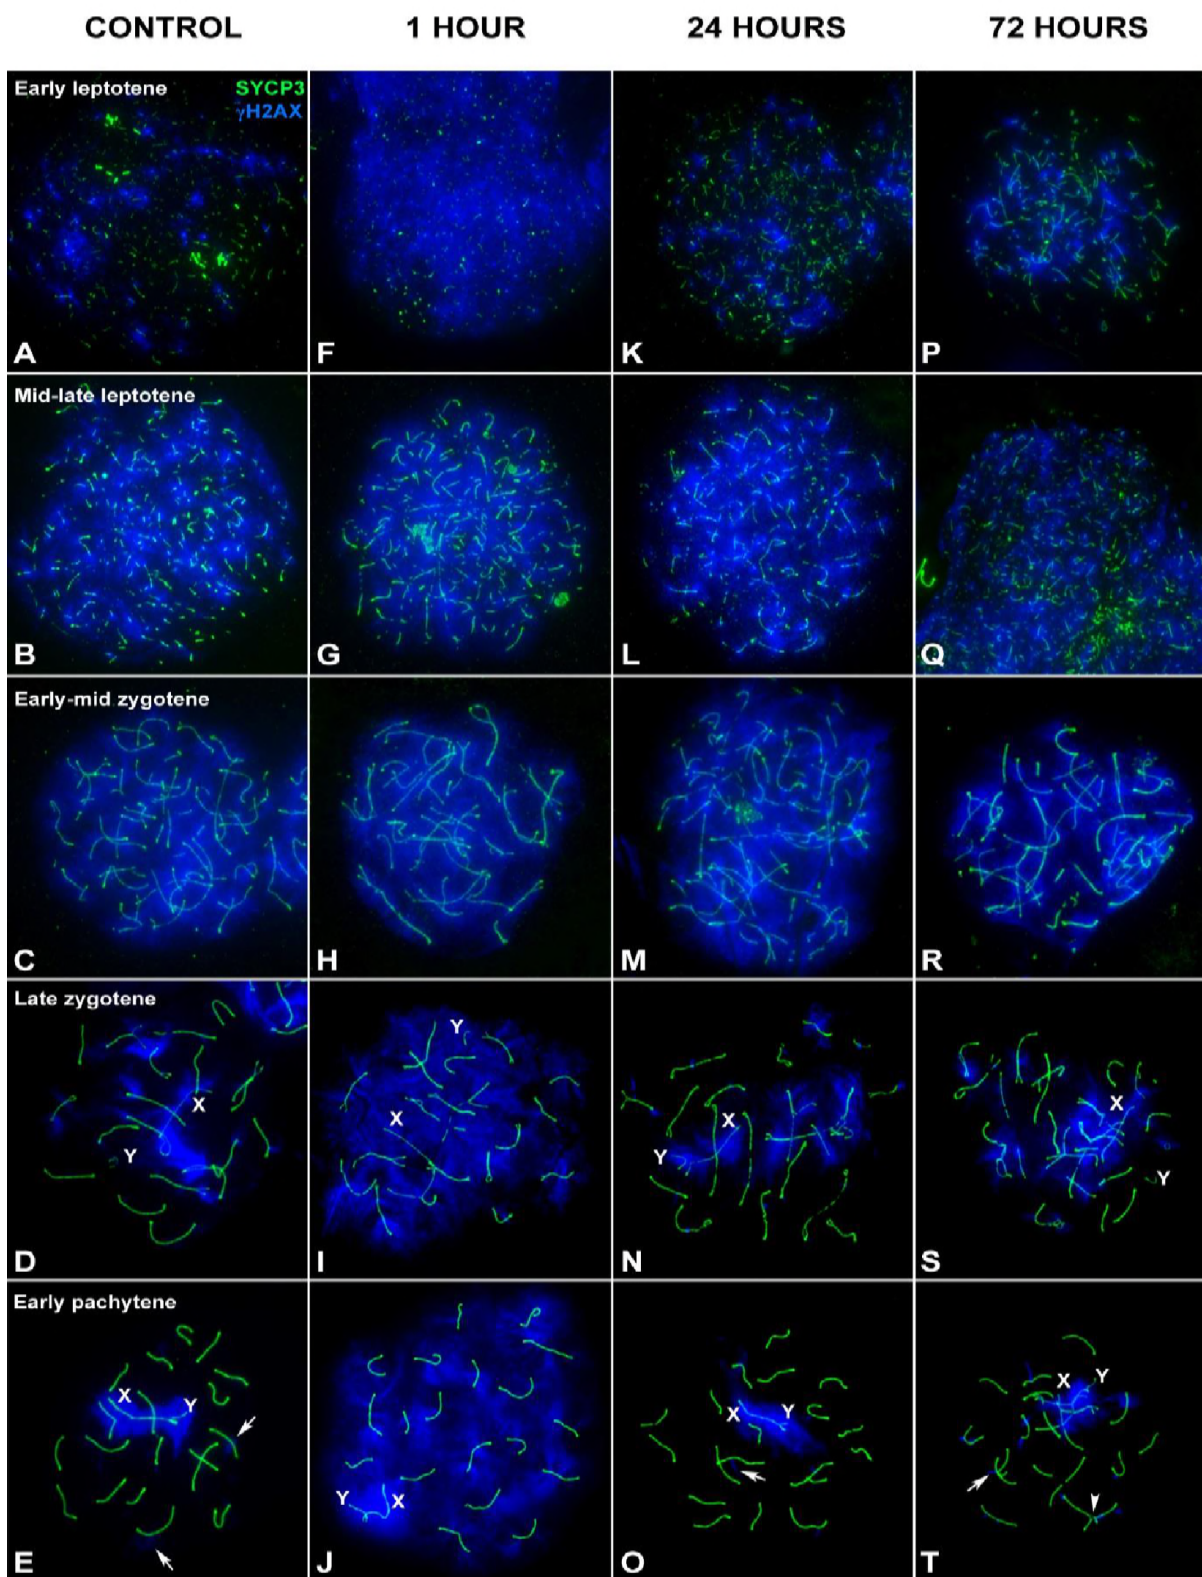

1229

1230

FIGURE 2

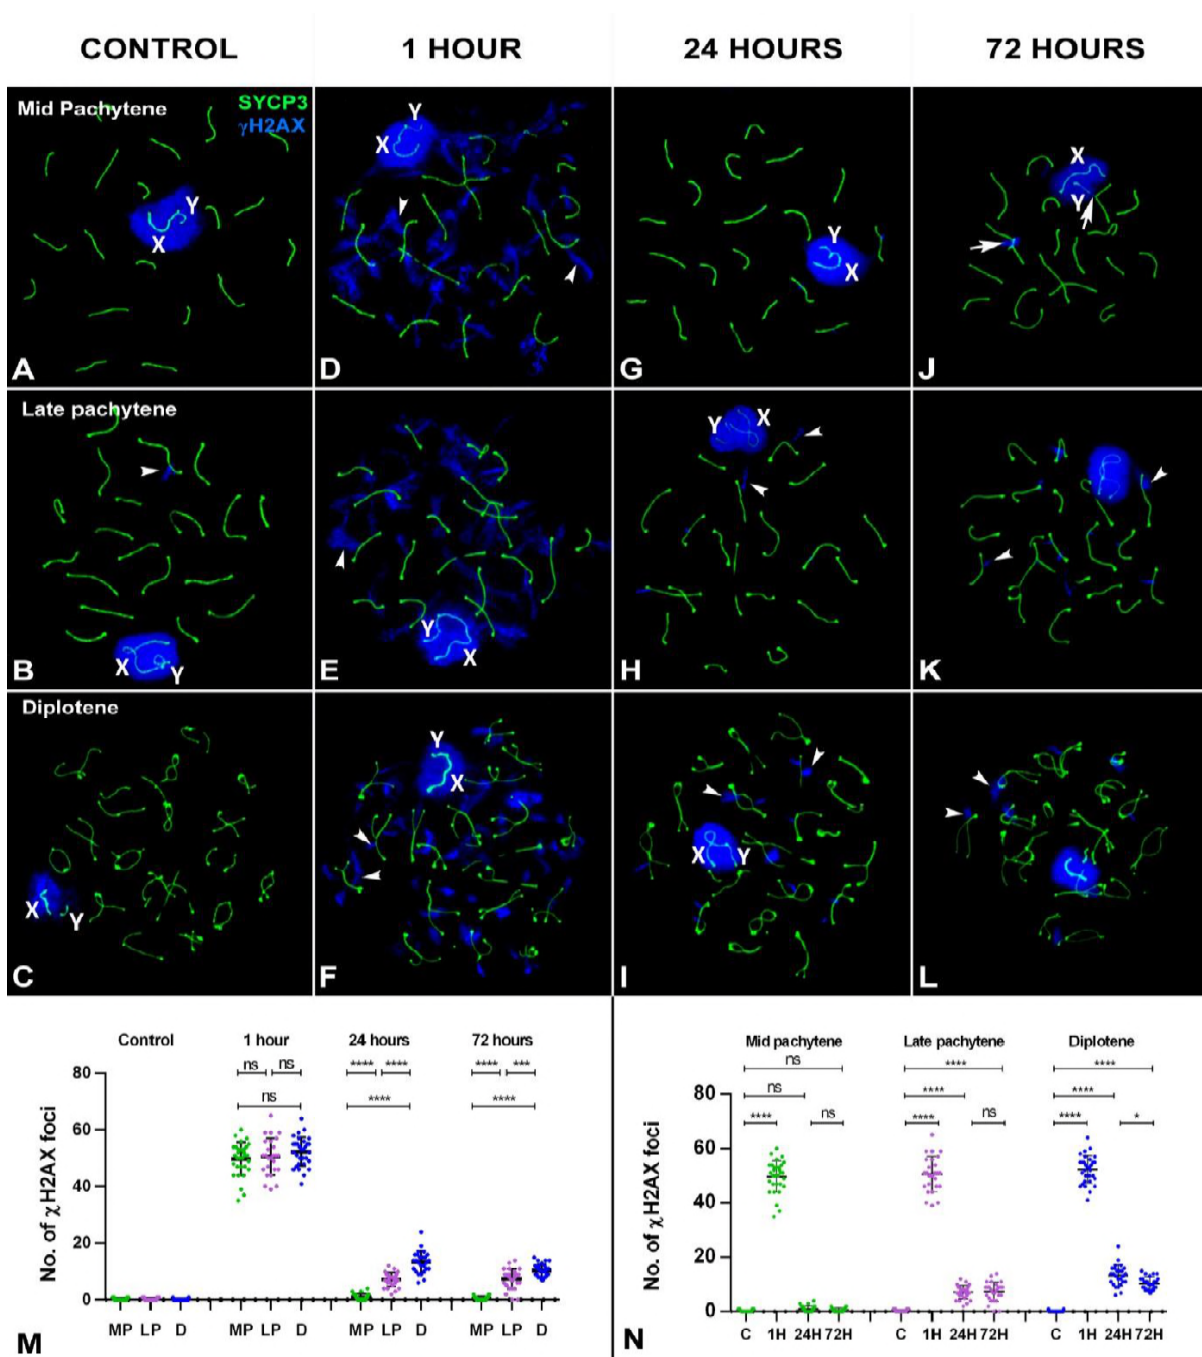

1231

1232

1233

FIGURE 3

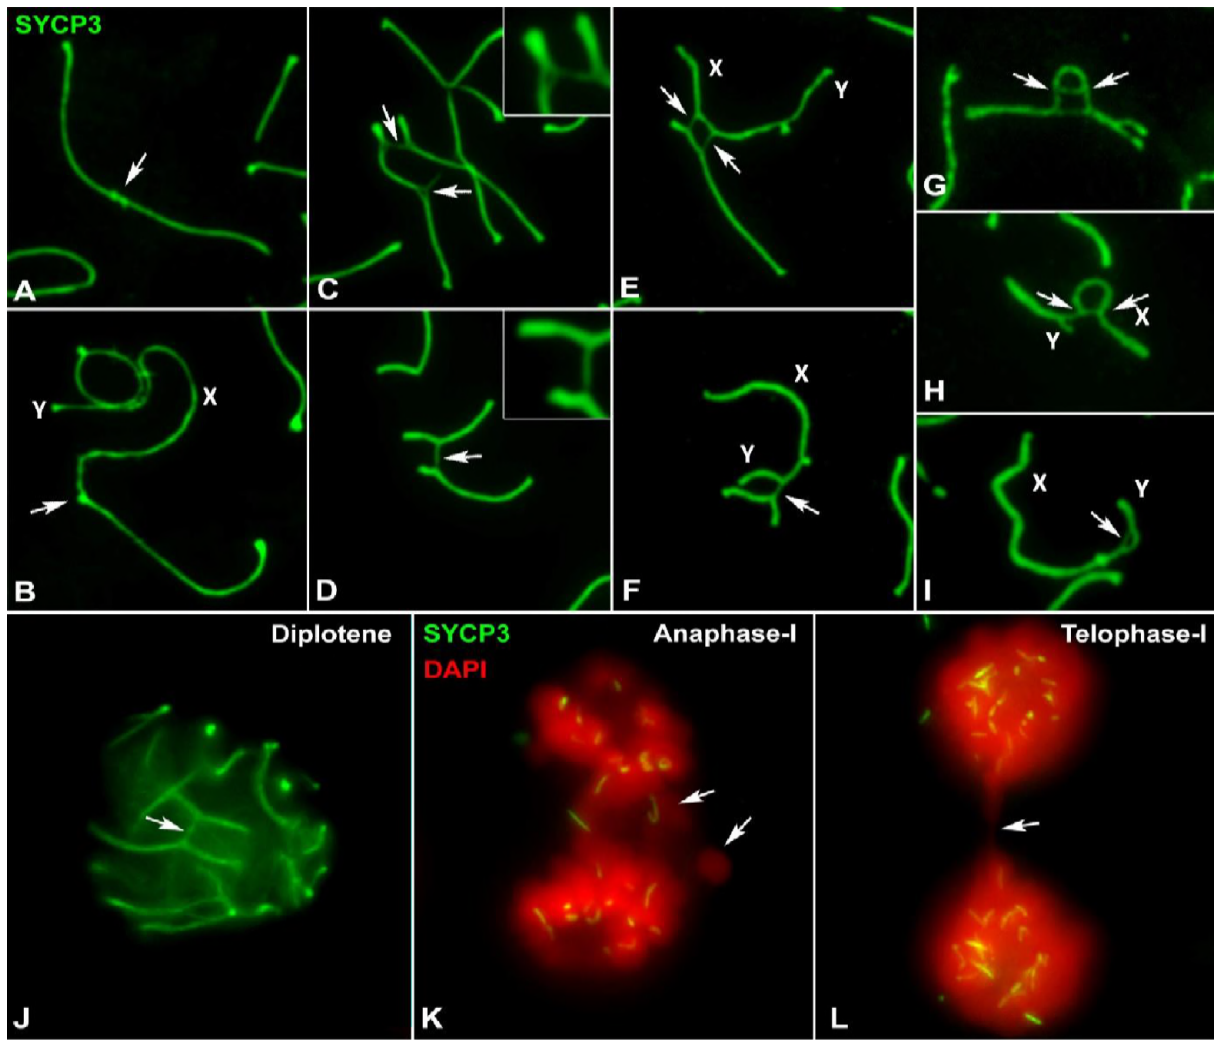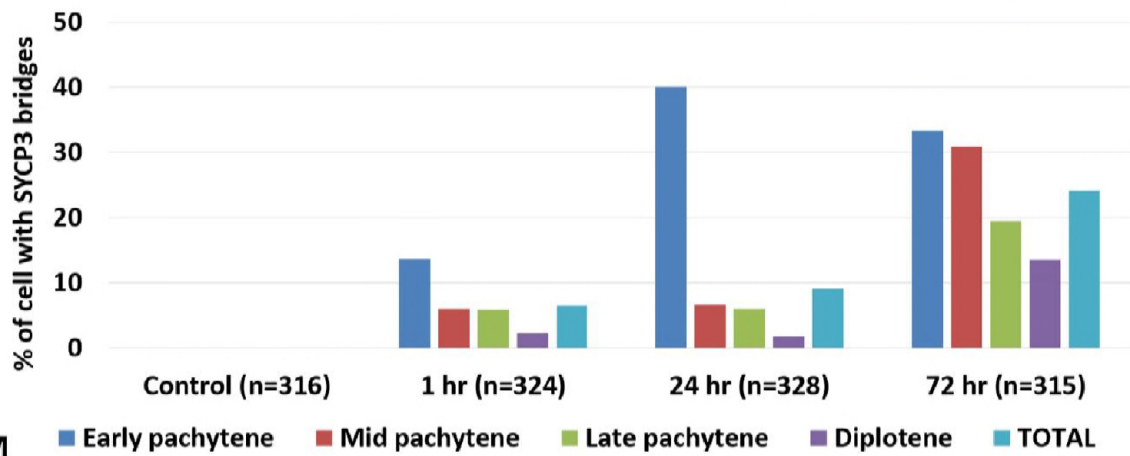

1234

1235



1236

FIGURE 4

1237

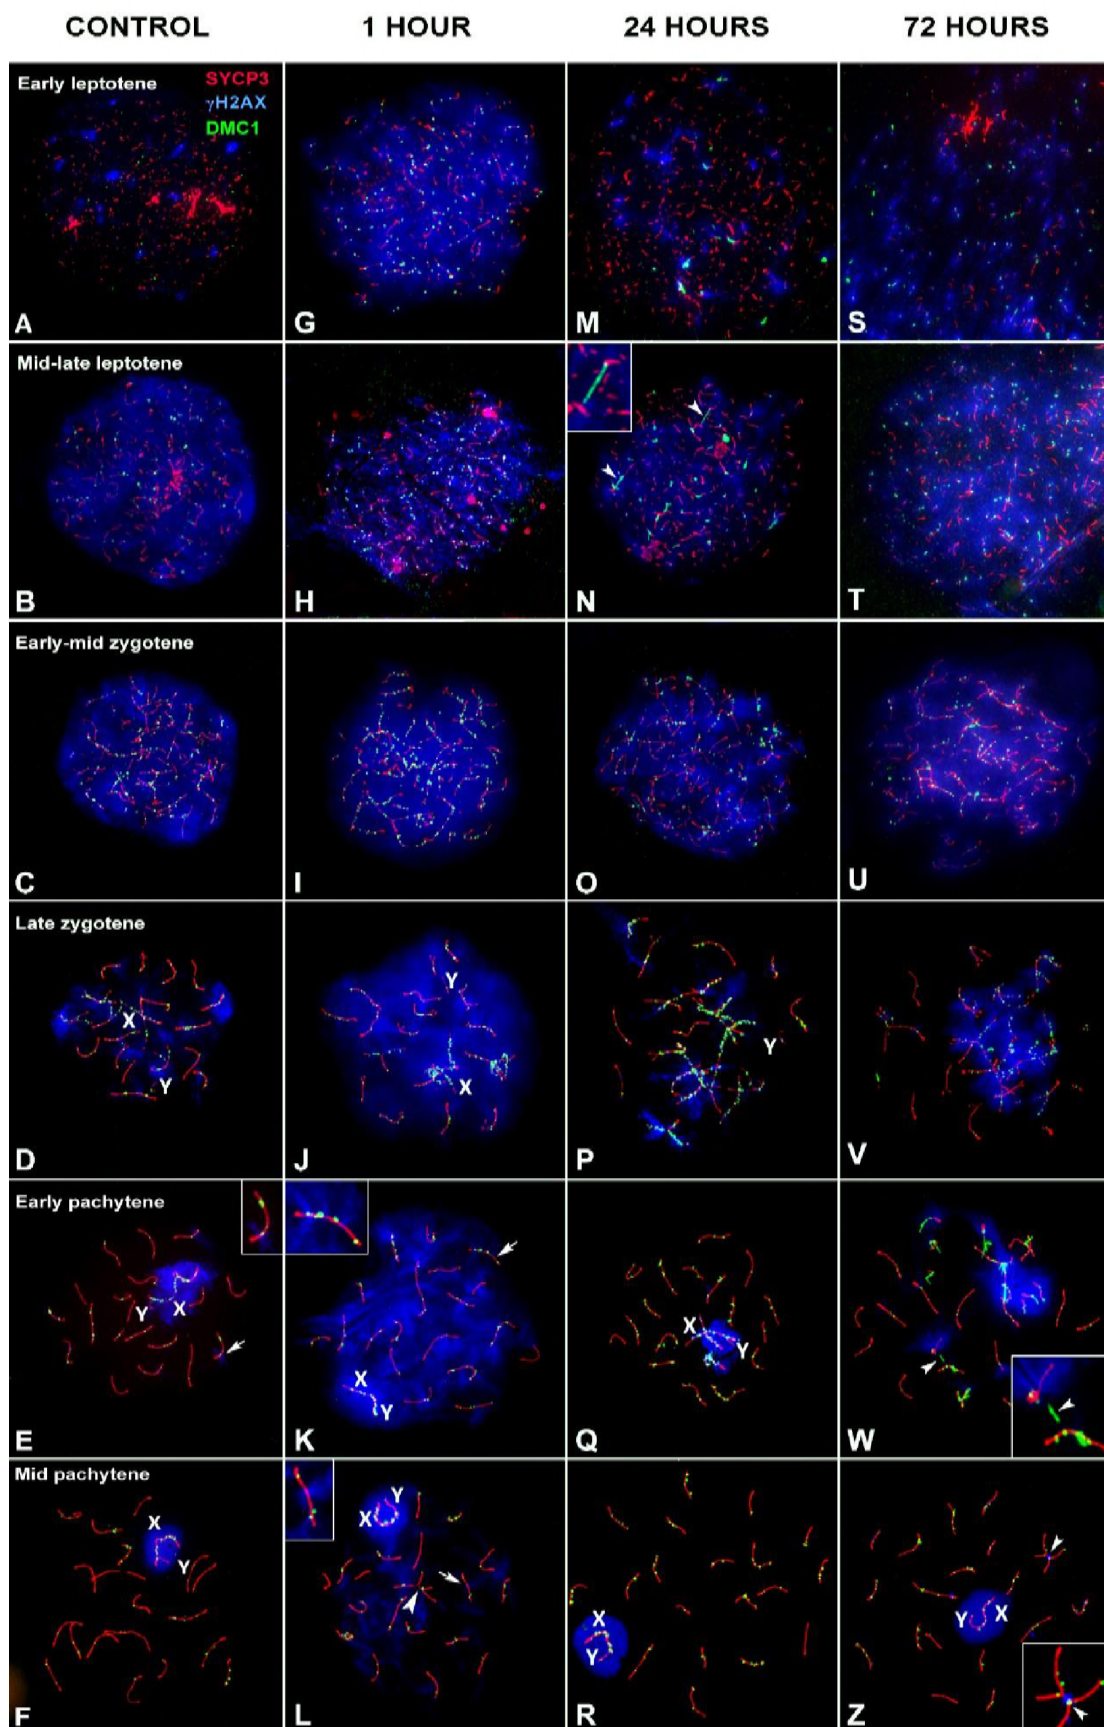

1238

FIGURE 5

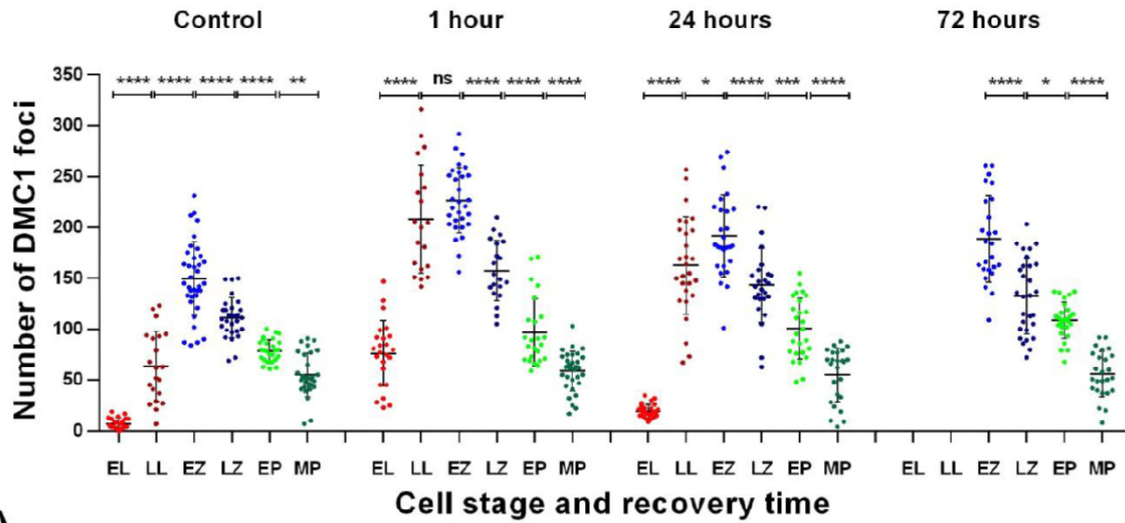

A

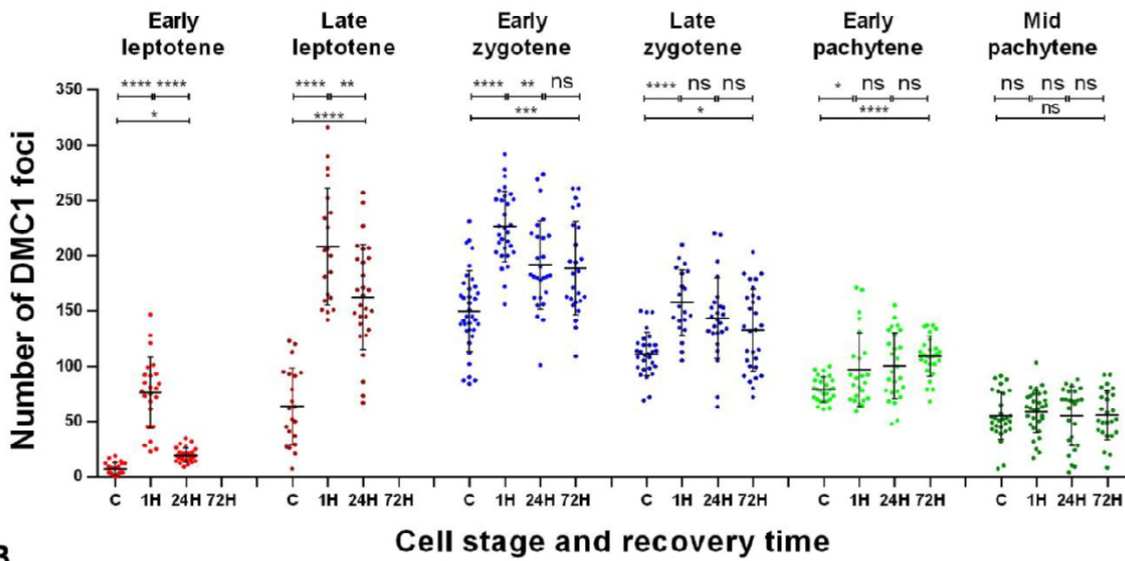

B

1239

1240

1241

FIGURE 6

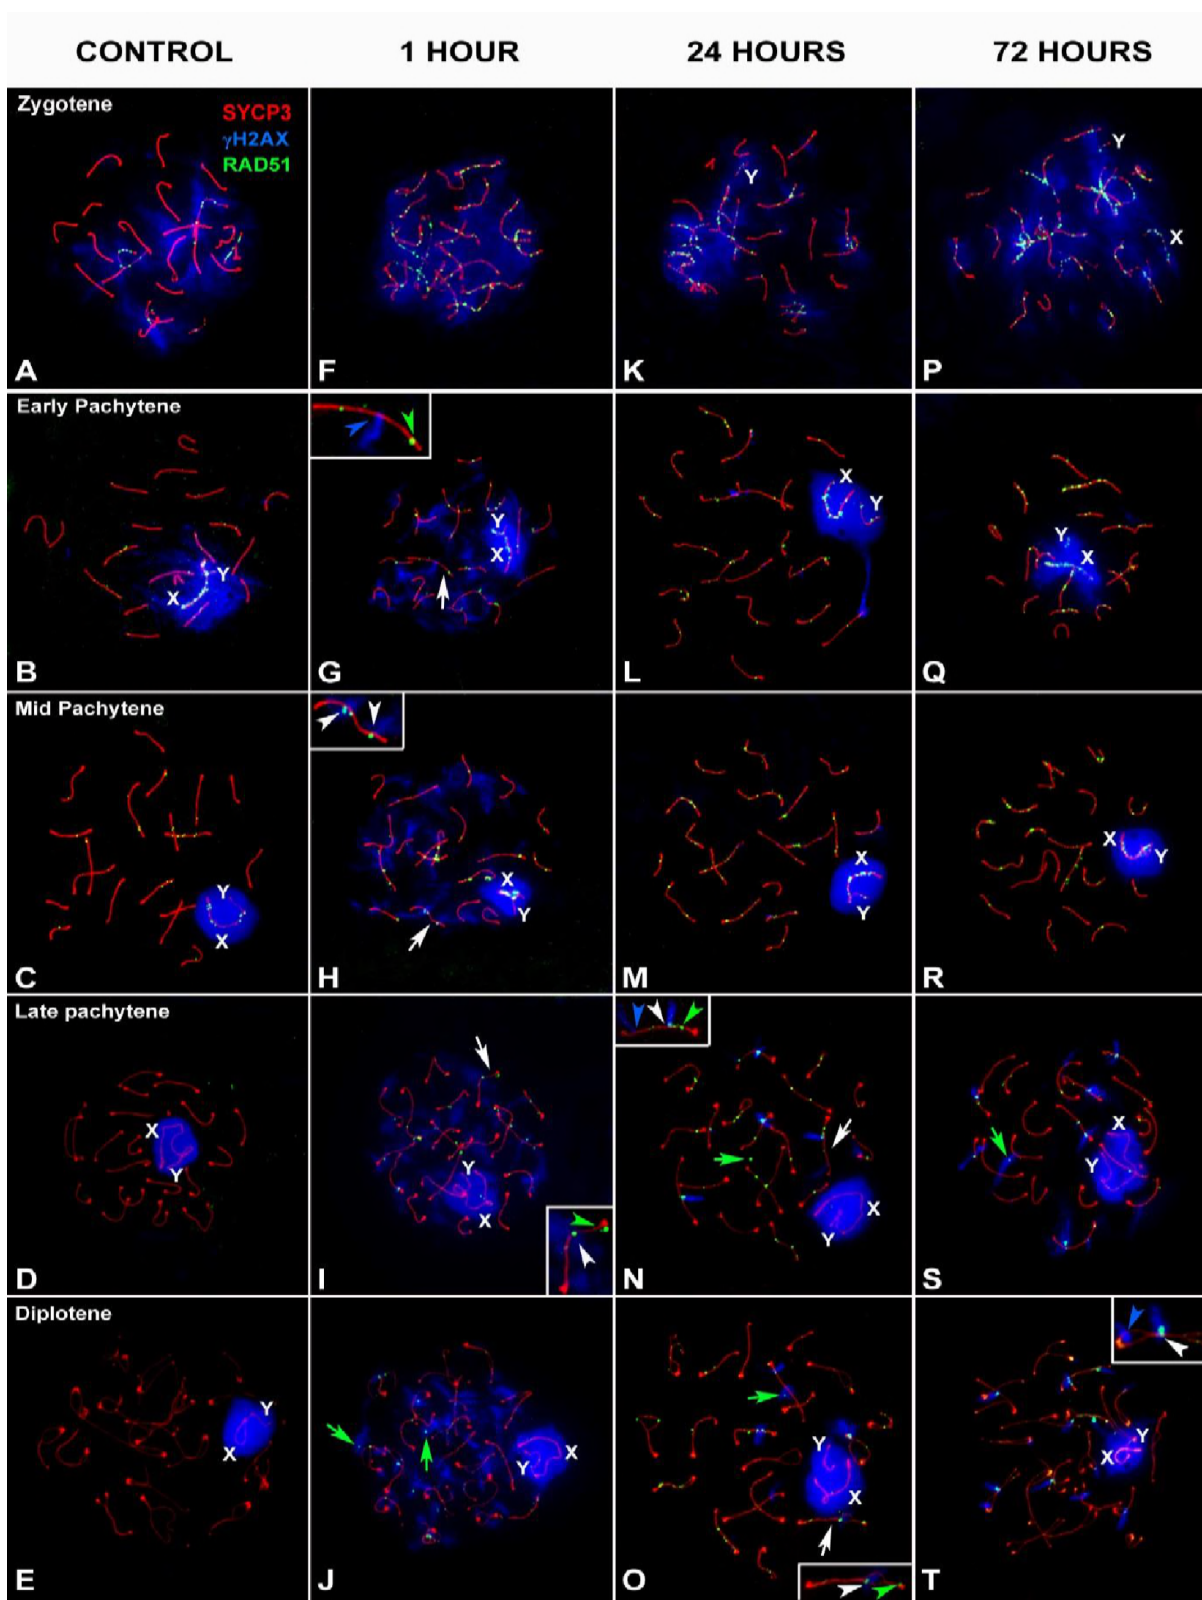

1242

1243

FIGURE 7

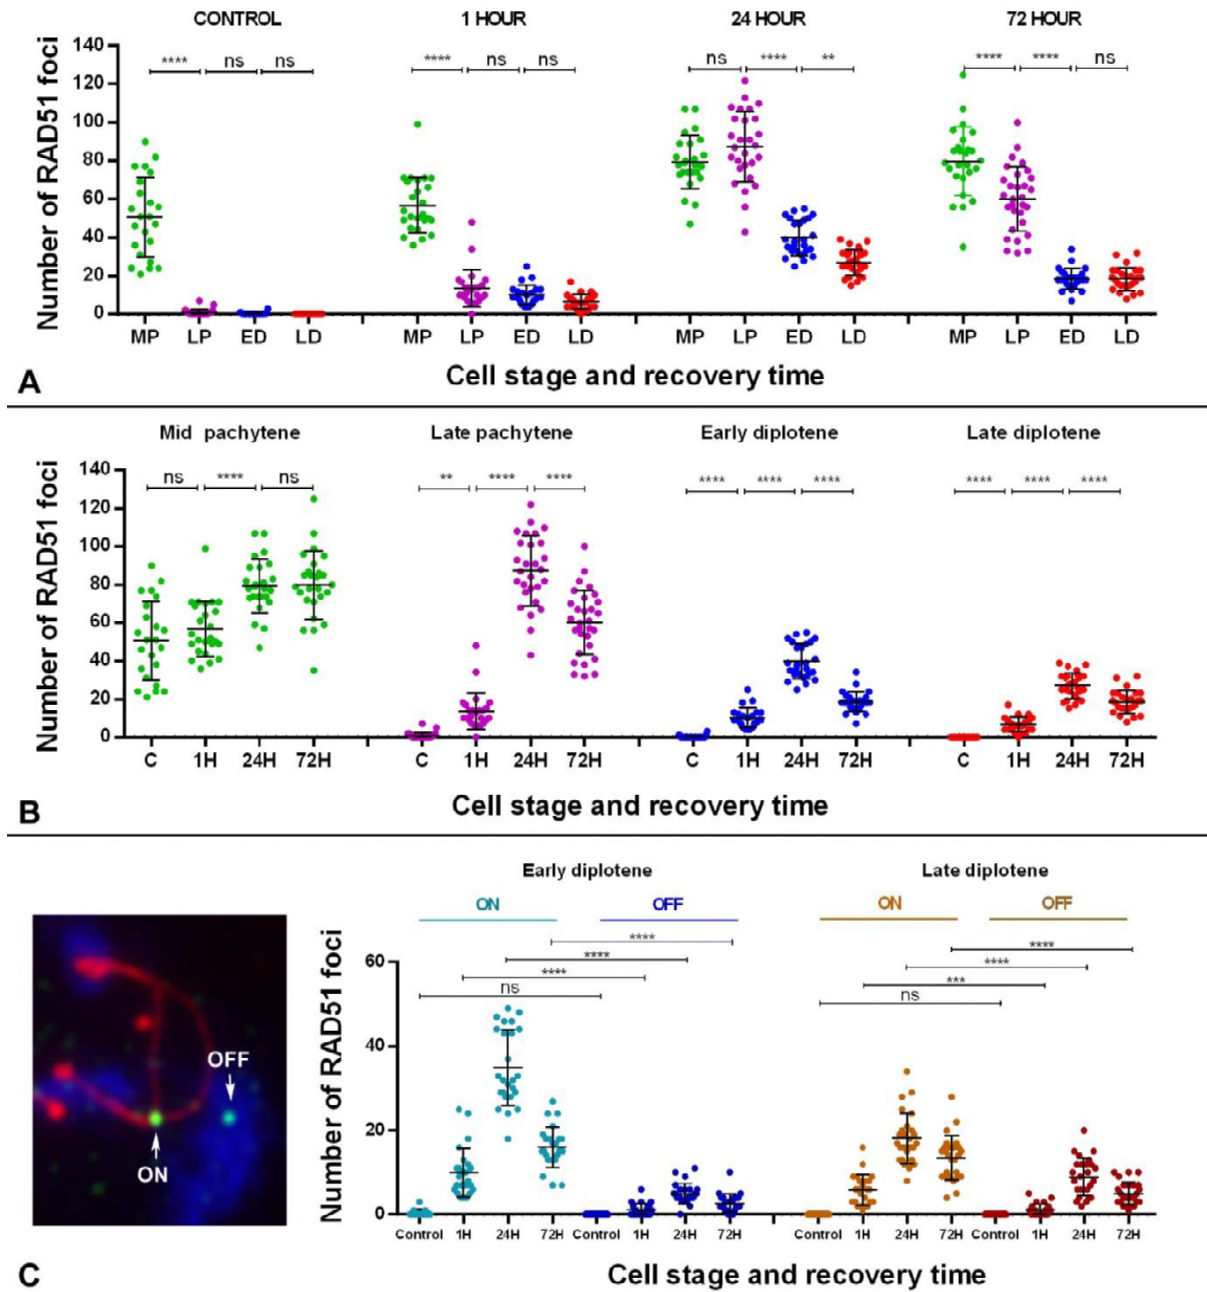

1244

1245

1246

FIGURE 8

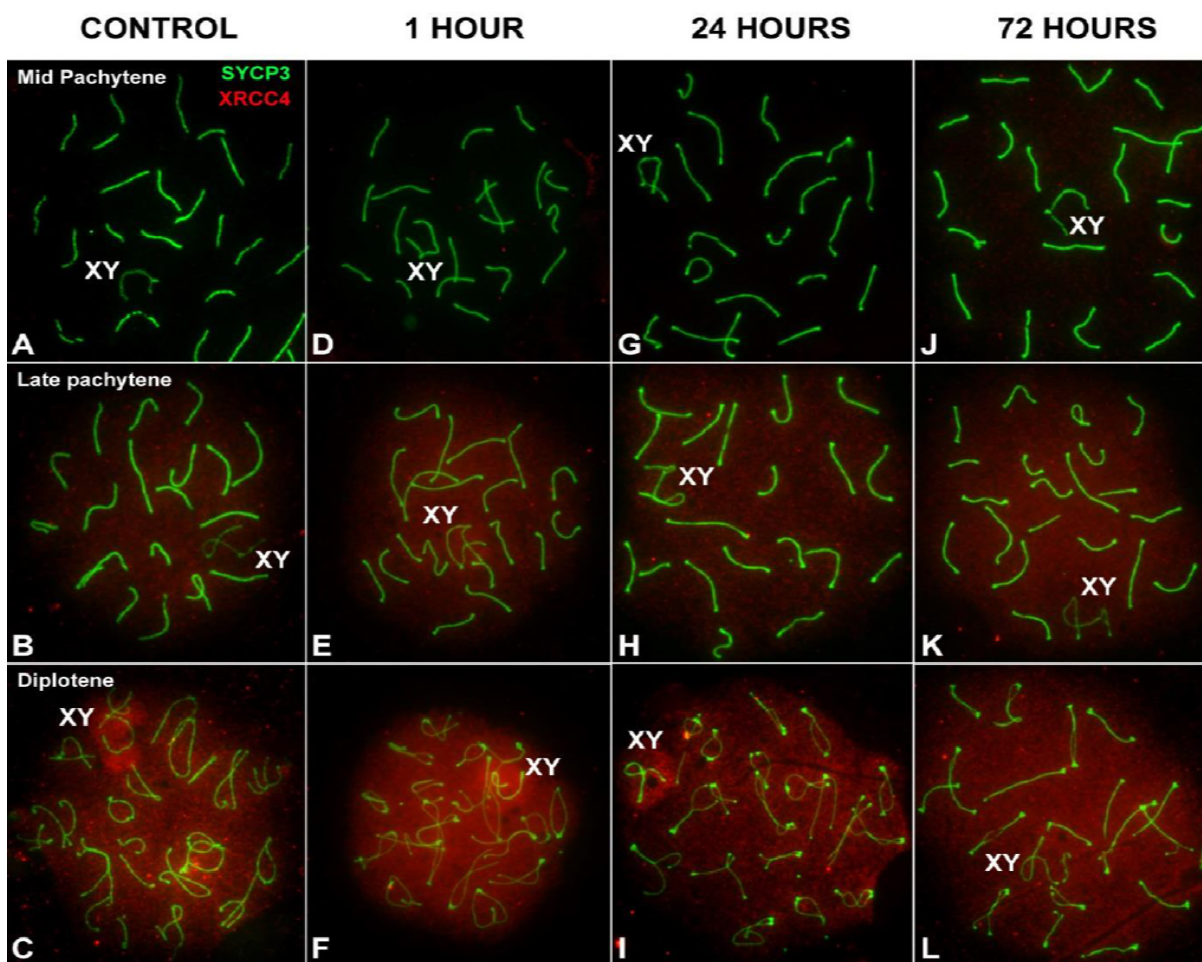

1247

1248

1249

FIGURE 9

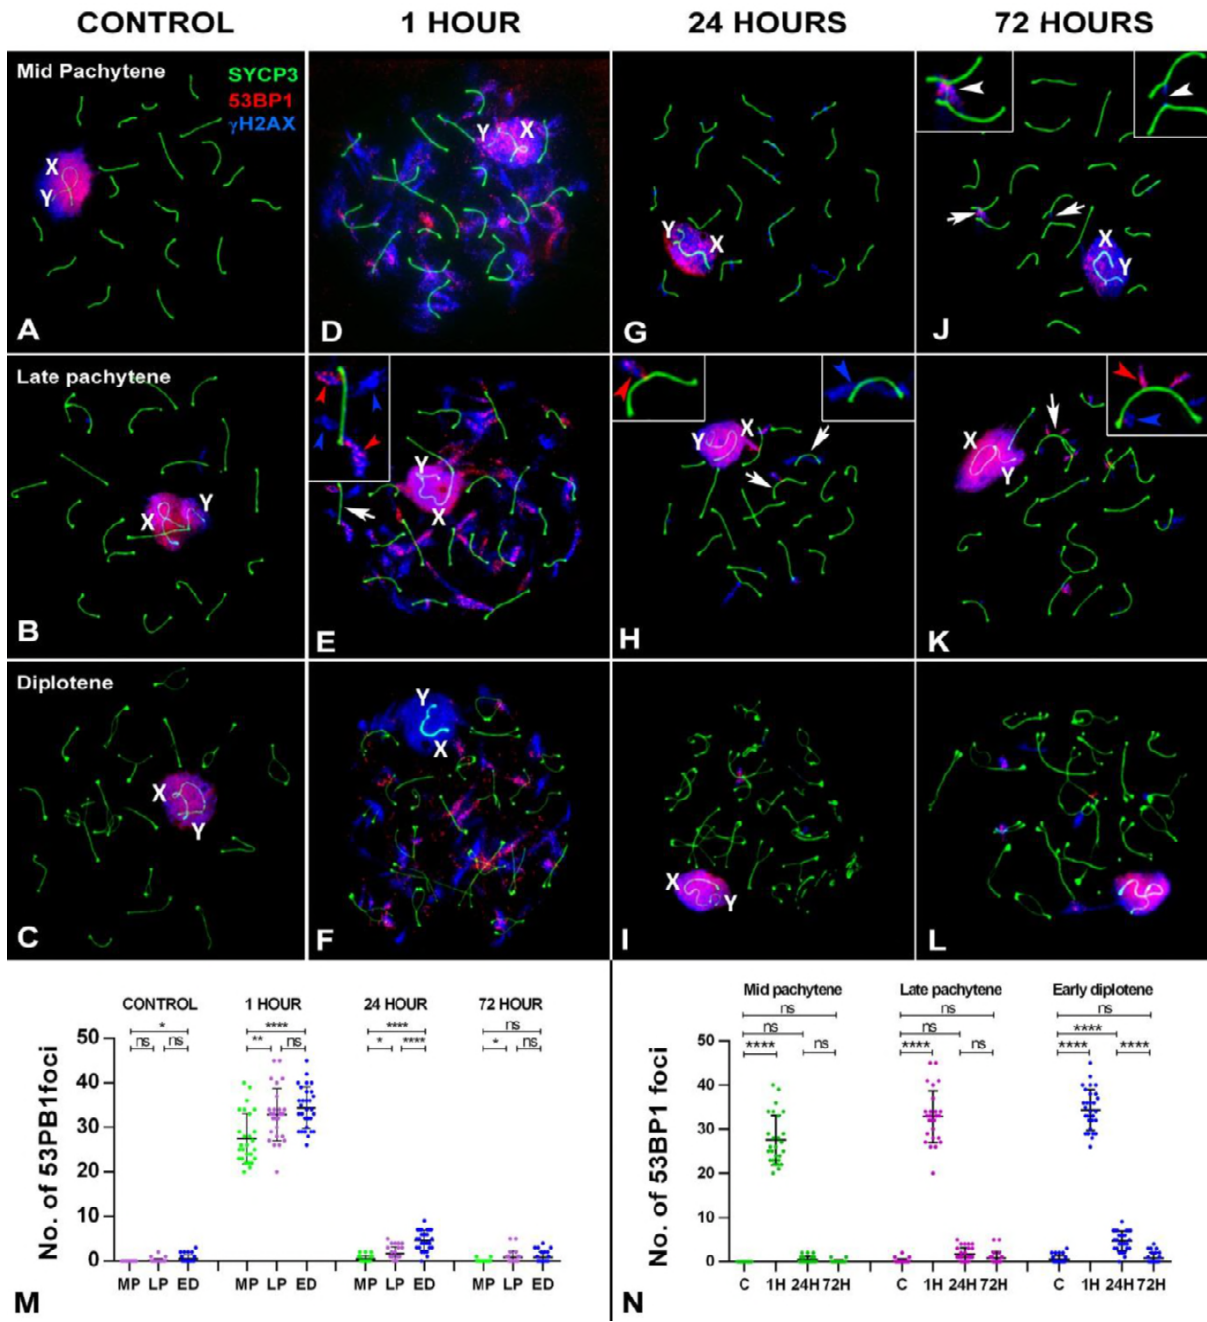

1250

1251

1252

FIGURE 10

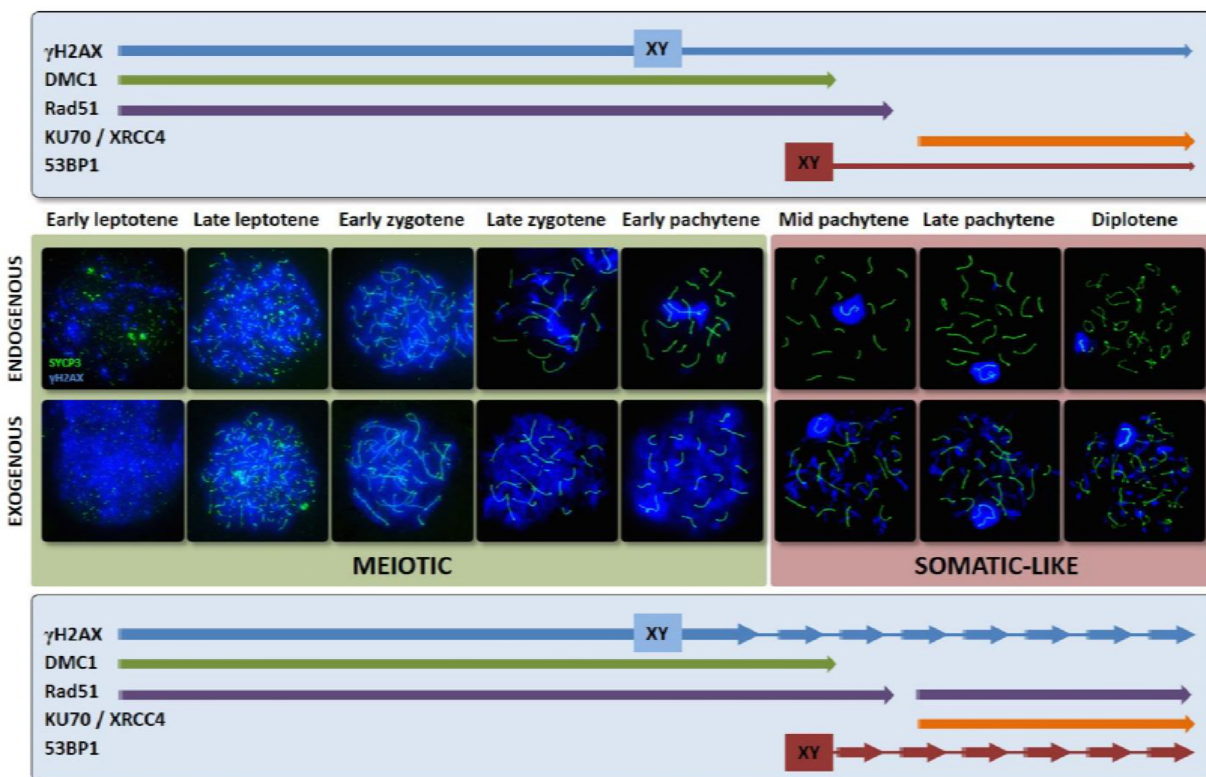

1253

1254

1255

### S1 FIGURE

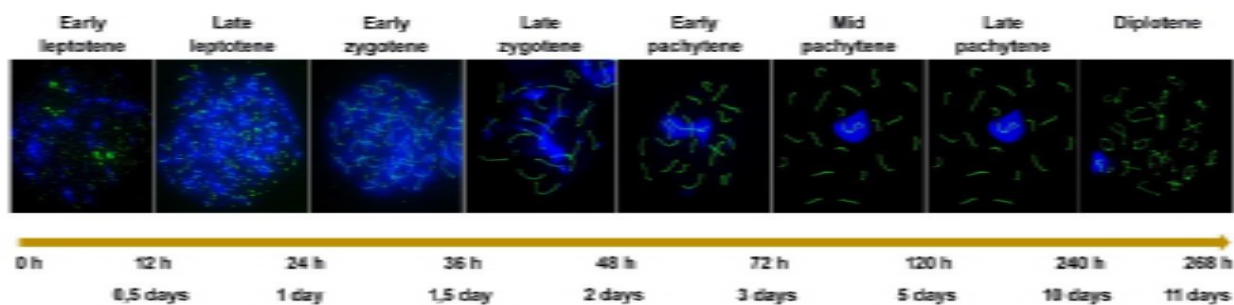

1256

1257

1258



1259

S2 FIGURE

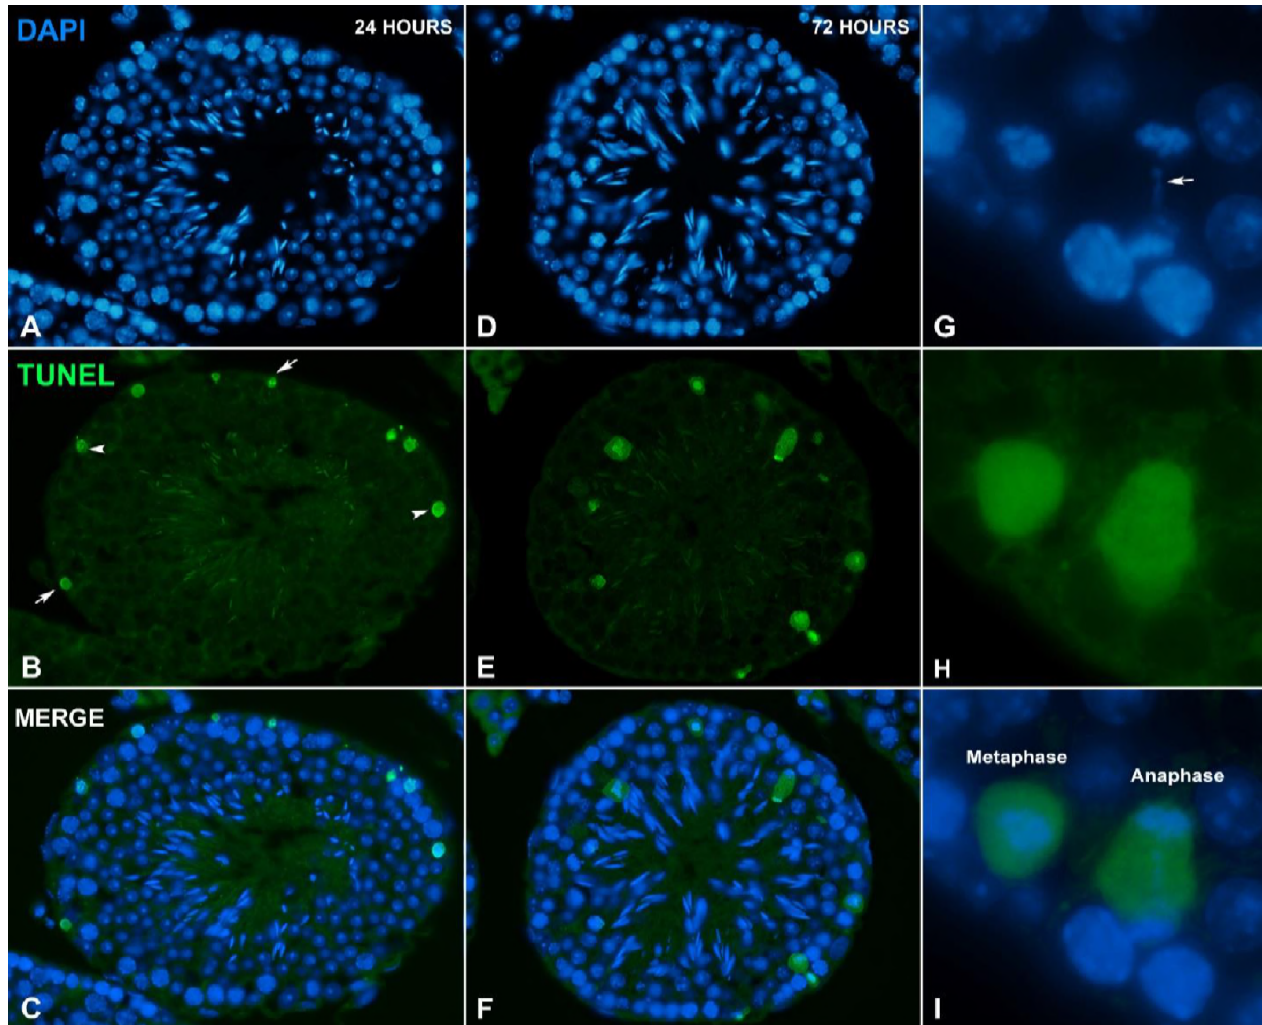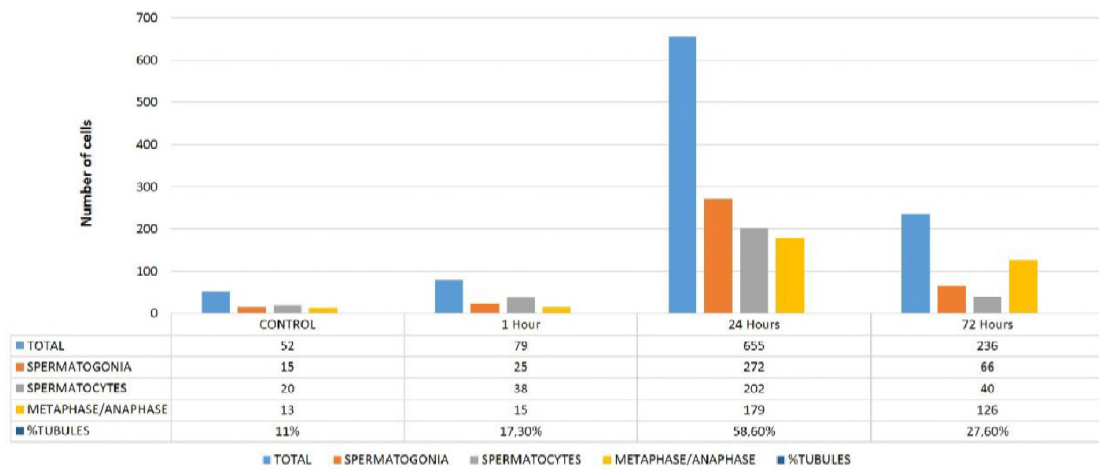

1260

1261

1262

**S3 TABLE**

| <b>γH2AX</b>    | <b>Mid pachytene</b> |      |    | <b>Late Pachytene</b> |      |    | <b>Early Diplotene</b> |      |    |
|-----------------|----------------------|------|----|-----------------------|------|----|------------------------|------|----|
|                 | Mean                 | SD   | n  | Mean                  | SD   | n  | Mean                   | SD   | n  |
| <b>CONTROL</b>  | 0.23                 | 0.43 | 25 | 0.31                  | 0.47 | 25 | 0.08                   | 0.27 | 25 |
| <b>1 HOUR</b>   | 50.66                | 4.72 | 29 | 51.46                 | 5.89 | 25 | 52.96                  | 4.61 | 29 |
| <b>24 HOURS</b> | 1                    | 1.17 | 26 | 7.15                  | 2.38 | 26 | 13.31                  | 3.89 | 26 |
| <b>72 HOURS</b> | 0.54                 | 0.71 | 26 | 7.35                  | 3.59 | 26 | 10.38                  | 2.33 | 26 |

1263

| <b>BRIDGES</b>  | <b>Early pachytene</b> |    | <b>Mid pachytene</b> |     | <b>Late Pachytene</b> |     | <b>Early Diplotene</b> |    | <b>TOTAL</b> |     |
|-----------------|------------------------|----|----------------------|-----|-----------------------|-----|------------------------|----|--------------|-----|
|                 | %                      | n  | %                    | n   | %                     | n   | %                      | n  | %            | n   |
| <b>CONTROL</b>  | 0                      | 48 | 0                    | 101 | 0                     | 110 | 0                      | 57 | 0            | 316 |
| <b>1 HOUR</b>   | 13.64                  | 44 | 5.98                 | 117 | 5.93                  | 118 | 2.22                   | 45 | 6.48         | 324 |
| <b>24 HOURS</b> | 40.00                  | 35 | 6.67                 | 120 | 5.98                  | 117 | 1.79                   | 56 | 9.15         | 328 |
| <b>72 HOURS</b> | 33.33                  | 21 | 30.89                | 123 | 19.40                 | 134 | 13.51                  | 37 | 24.13        | 315 |

1264

| <b>DMC1</b>    | <b>Early Leptotene</b> |       |    | <b>Mid-late Leptotene</b> |       |    | <b>Early-mi Zygotene</b> |       |    | <b>Late Zygotene</b> |       |    | <b>Early Pachytene</b> |       |    | <b>Mid Pachytene</b> |       |    |
|----------------|------------------------|-------|----|---------------------------|-------|----|--------------------------|-------|----|----------------------|-------|----|------------------------|-------|----|----------------------|-------|----|
|                | Mean                   | SD    | n  | Mean                      | SD    | n  | Mean                     | SD    | n  | Mean                 | SD    | n  | Mean                   | SD    | n  | Mean                 | SD    | n  |
| <b>CONTROL</b> | 7.04                   | 5.39  | 24 | 63.62                     | 34.49 | 21 | 149.75                   | 36.41 | 36 | 111.10               | 19.74 | 29 | 78.89                  | 11.08 | 27 | 55.00                | 21.21 | 29 |
| <b>1 HOUR</b>  | 76.08                  | 32.15 | 24 | 208.25                    | 53.11 | 20 | 226.57                   | 32.06 | 30 | 157.50               | 29.62 | 20 | 96.79                  | 33.14 | 24 | 58.87                | 19.49 | 31 |
| <b>24 HOUR</b> | 19.48                  | 6.45  | 27 | 162.68                    | 47.62 | 28 | 191.70                   | 40.12 | 27 | 143.36               | 36.43 | 25 | 100.50                 | 29.76 | 26 | 54.96                | 26.56 | 25 |
| <b>72 HOUR</b> |                        |       |    |                           |       |    | 188.60                   | 42.45 | 25 | 132.62               | 33.07 | 29 | 108.96                 | 18.01 | 27 | 55.88                | 22.51 | 25 |

1265

| <b>RAD51</b>    | <b>Mid pachytene</b> |       |    | <b>Late Pachytene</b> |       |    | <b>Early Diplotene</b> |       |    | <b>Late Diplotene</b> |      |    |
|-----------------|----------------------|-------|----|-----------------------|-------|----|------------------------|-------|----|-----------------------|------|----|
|                 | Mean                 | SD    | n  | Mean                  | SD    | n  | Mean                   | SD    | n  | Mean                  | SD   | n  |
| <b>CONTROL</b>  | 50.61                | 20.76 | 23 | 0.85                  | 1.66  | 25 | 0.23                   | 0.65  | 25 | 0                     | 0    | 26 |
| <b>1 HOUR</b>   | 56.80                | 14.42 | 27 | 16.62                 | 18.06 | 28 | 11.04                  | 6.60  | 24 | 6.64                  | 3.82 | 30 |
| <b>24 HOURS</b> | 79.36                | 14.07 | 26 | 87.36                 | 18.51 | 23 | 41.08                  | 12.18 | 25 | 27.04                 | 4.53 | 25 |
| <b>72 HOURS</b> | 79.88                | 17.95 | 25 | 60.10                 | 16.92 | 25 | 18.64                  | 5.44  | 26 | 18.42                 | 6.00 | 26 |

1266

| <b>RAD51</b>    | <b>Early diplotene ON</b> |      |    | <b>Early diplotene OFF</b> |      |    | <b>Late Diplotene ON</b> |      |    | <b>Late Diplotene OFF</b> |      |    |
|-----------------|---------------------------|------|----|----------------------------|------|----|--------------------------|------|----|---------------------------|------|----|
|                 | Mean                      | SD   | n  | Mean                       | SD   | n  | Mean                     | SD   | n  | Mean                      | SD   | n  |
| <b>CONTROL</b>  | 0.23                      | 0.65 | 25 | 0                          | 0    | 25 | 0                        | 0    | 26 | 0                         | 0    | 26 |
| <b>1 HOUR</b>   | 10.00                     | 5.78 | 24 | 1.04                       | 1.51 | 24 | 5.83                     | 3.64 | 24 | 1.08                      | 1.41 | 24 |
| <b>24 HOURS</b> | 36.12                     | 8.96 | 25 | 4.96                       | 2.46 | 25 | 18.12                    | 6.05 | 26 | 8.92                      | 4.53 | 26 |
| <b>72 HOURS</b> | 15.96                     | 4.83 | 26 | 2.68                       | 2.17 | 26 | 13.42                    | 5.30 | 26 | 5.00                      | 2.70 | 26 |

1267

| <b>53BP1</b>    | <b>Mid pachytene</b> |      |    | <b>Late Pachytene</b> |      |    | <b>Early Diplotene</b> |      |    |
|-----------------|----------------------|------|----|-----------------------|------|----|------------------------|------|----|
|                 | Mean                 | SD   | n  | Mean                  | SD   | n  | Mean                   | SD   | n  |
| <b>CONTROL</b>  | 0.00                 | 0.00 | 25 | 0.16                  | 0.47 | 25 | 0.50                   | 0.91 | 26 |
| <b>1 HOUR</b>   | 27.48                | 5.62 | 27 | 32.85                 | 5.89 | 27 | 34.33                  | 4.66 | 30 |
| <b>24 HOURS</b> | 0.48                 | 0.71 | 25 | 1.63                  | 1.55 | 27 | 4.63                   | 2.22 | 27 |
| <b>72 HOURS</b> | 0.08                 | 0.28 | 25 | 0.84                  | 1.40 | 26 | 0.81                   | 1.27 | 25 |

1268

1269

1270

S4 FIGURE

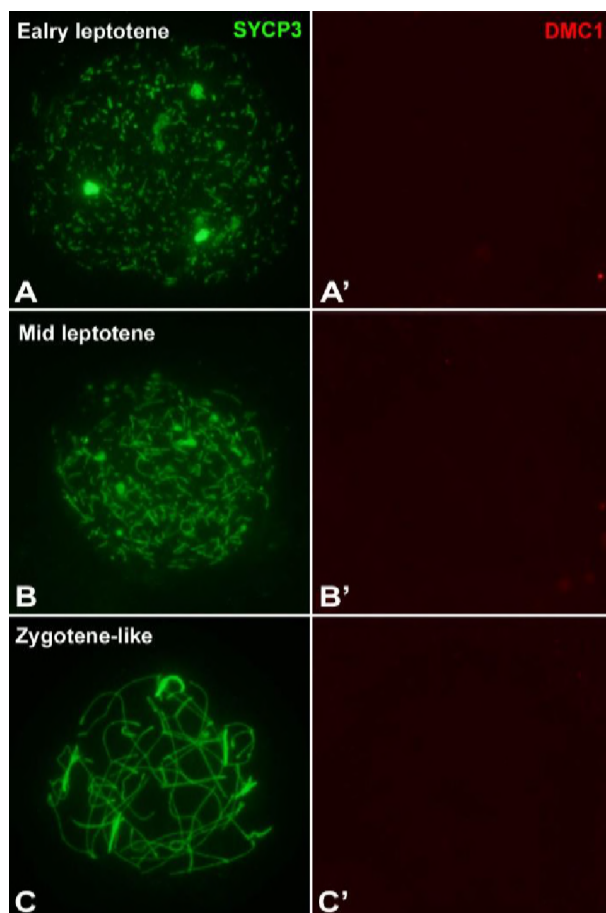

1271

1272

1273

S5 FIGURE

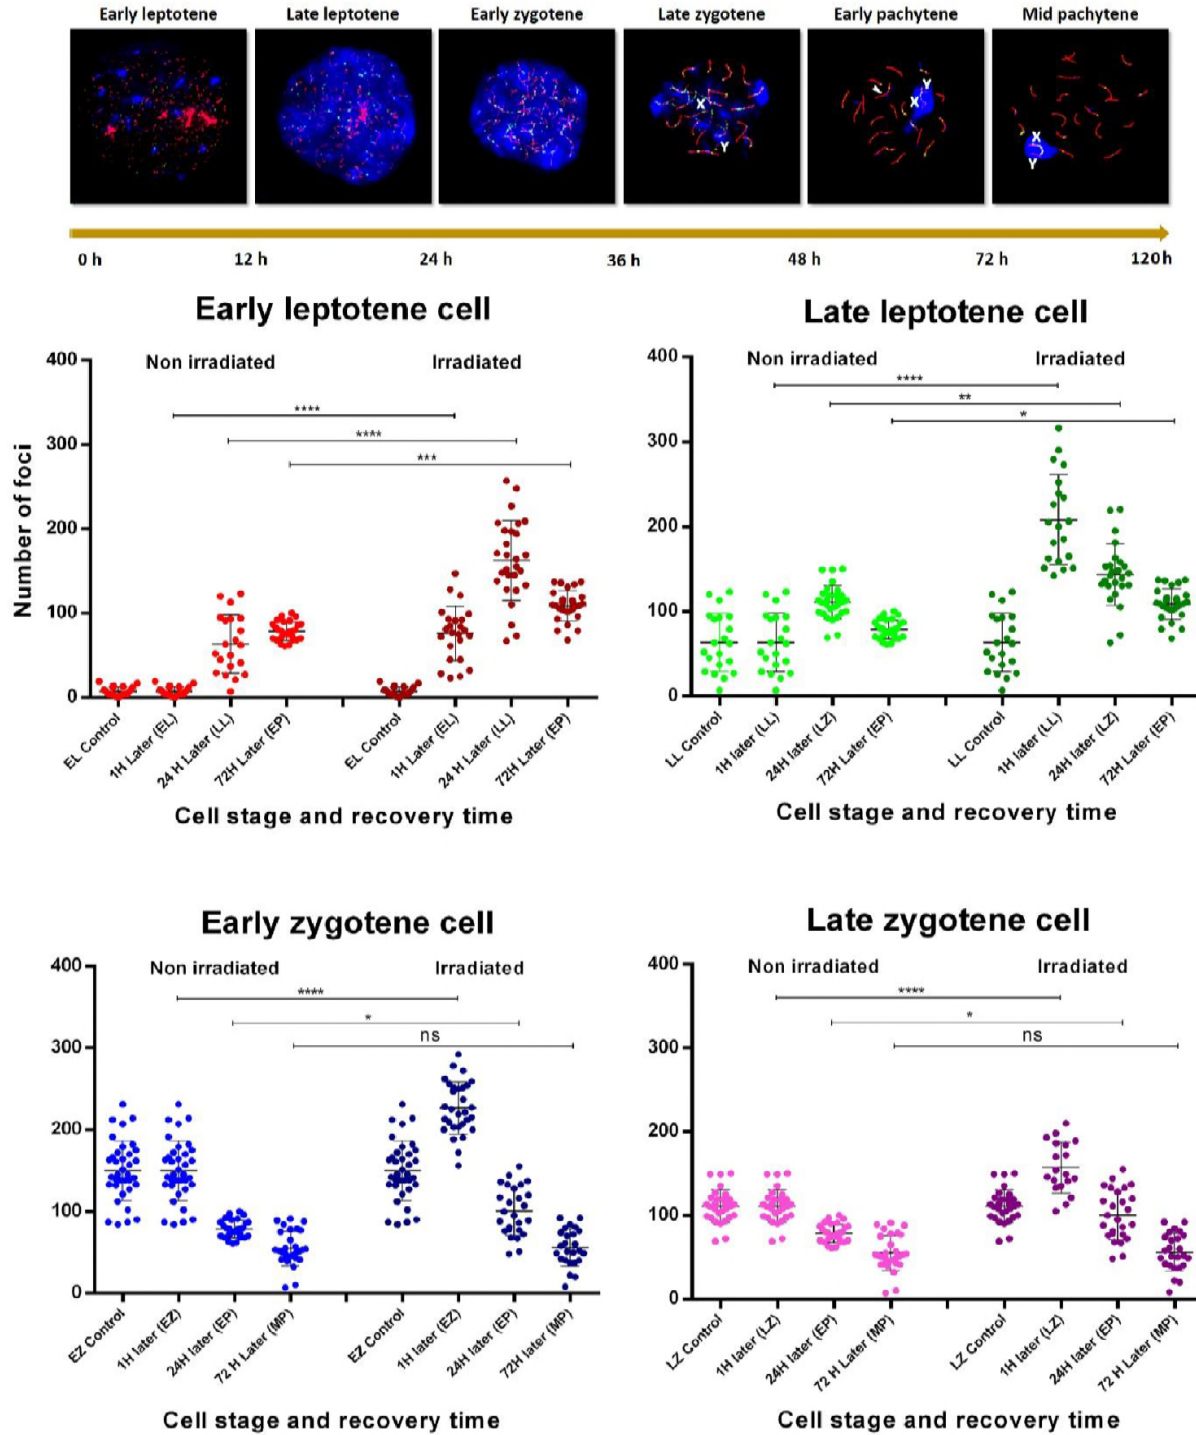

1274

1275

1276

S6 FIGURE

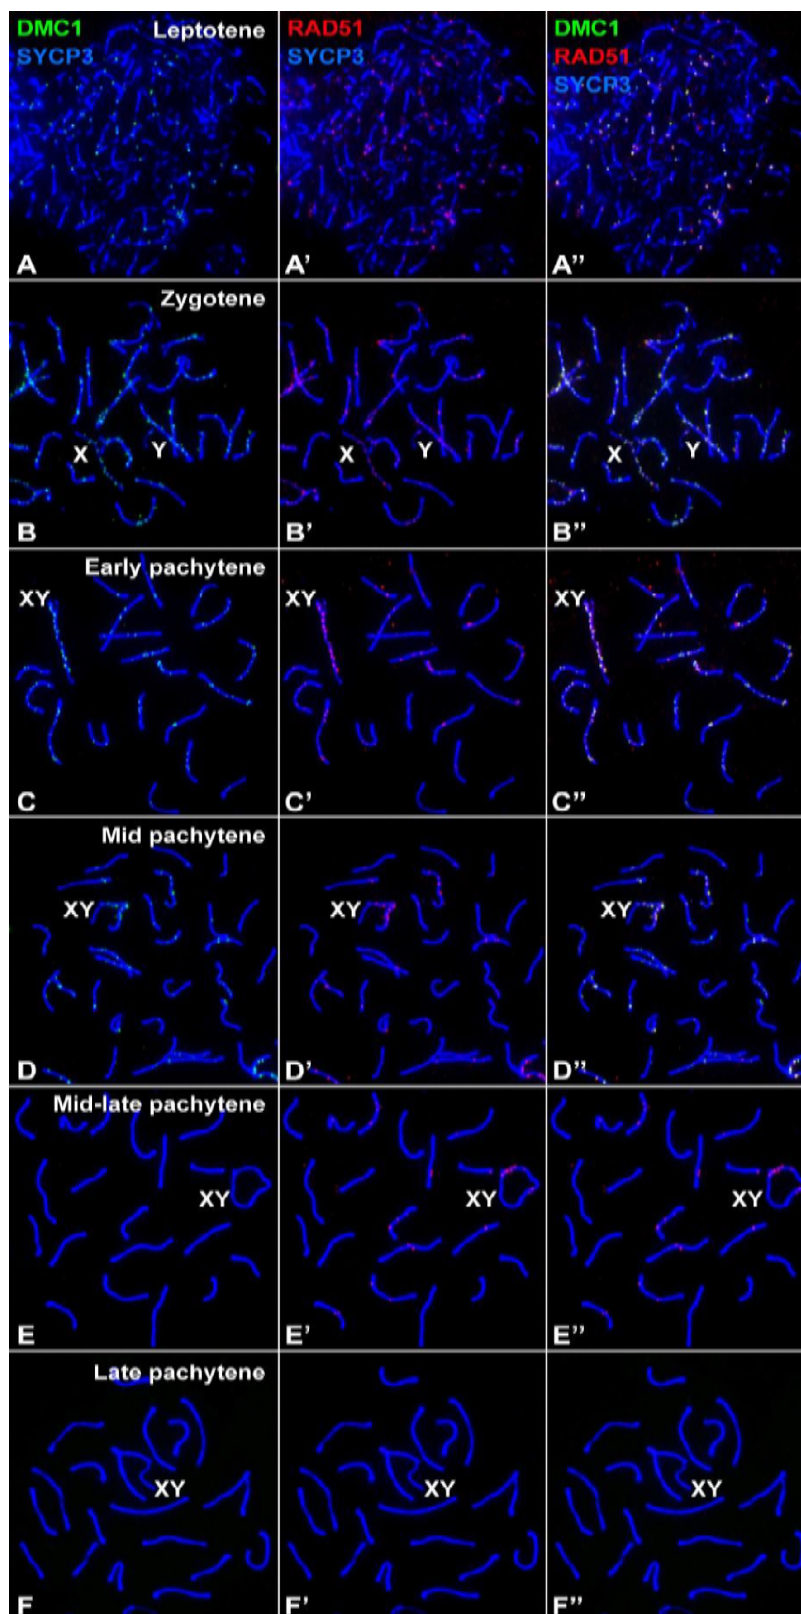

1277

1278

S7 FIGURE

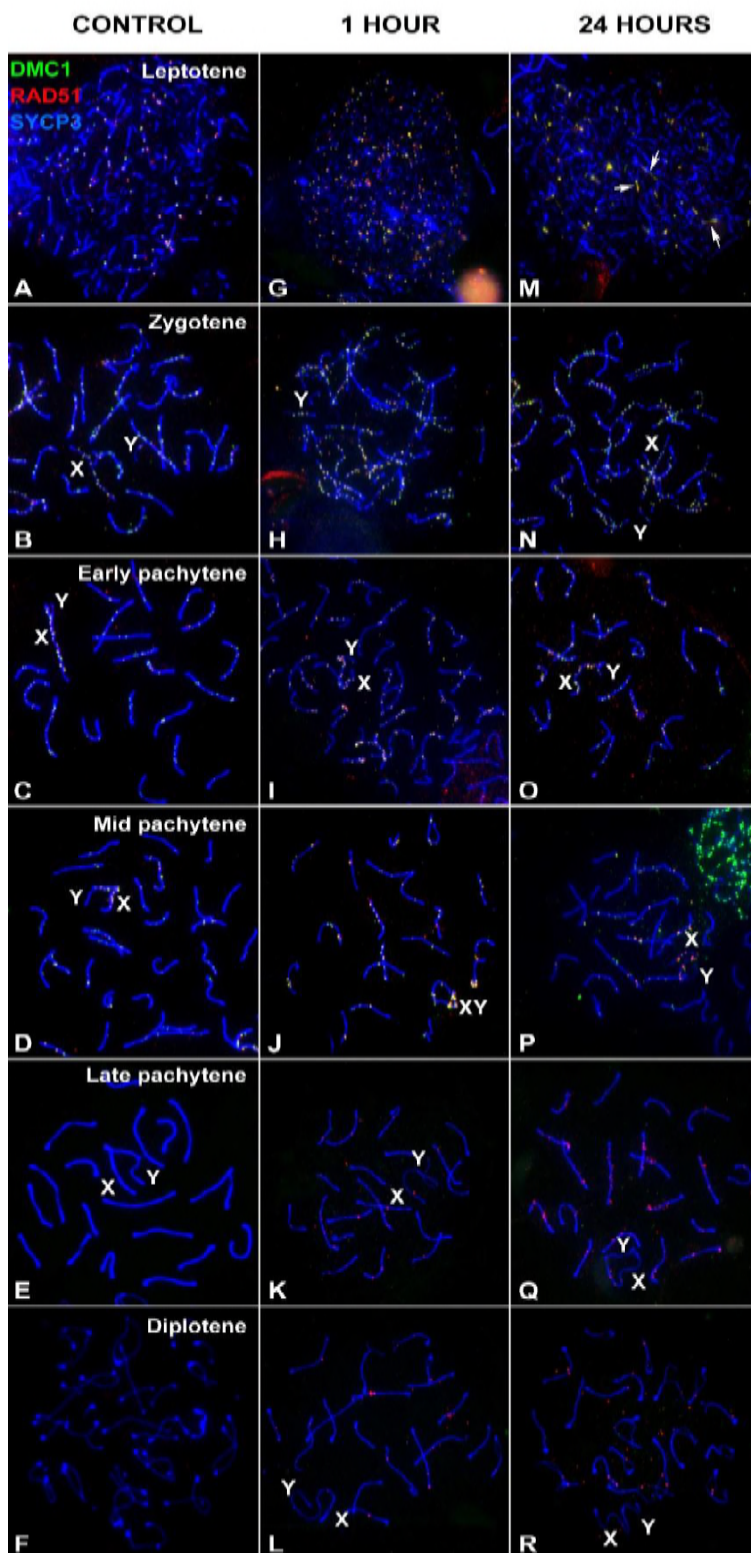

1279

1280

S8 FIGURE

1281

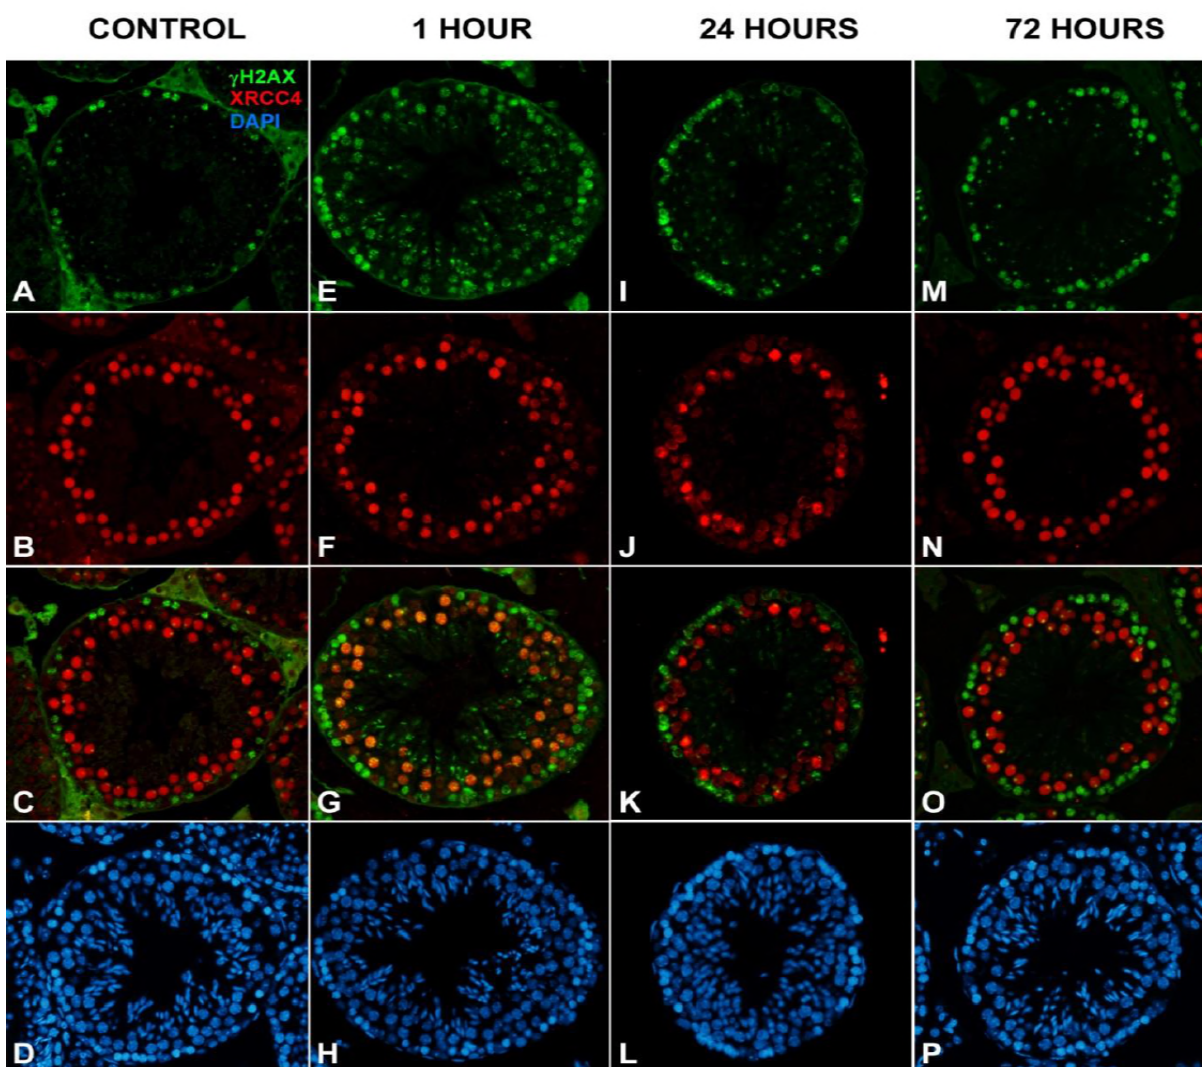

1282
